1 **Molecular determinants of SR-B1-dependent *Plasmodium* sporozoite entry into**  
2 **hepatocytic cells.**

3  
4 Anne-Claire Langlois<sup>a</sup>, Giulia Manzoni<sup>a</sup>, Laetitia Vincensini<sup>a</sup>, Romain Coppée<sup>b</sup>, Carine  
5 Marinach<sup>a</sup>, Maryse Guérin<sup>c</sup>, Thierry Huby<sup>c</sup>, Véronique Carrière<sup>d</sup>, François-Loïc Cosset<sup>e</sup>,  
6 Marlène Dreux<sup>e</sup>, Eric Rubinstein<sup>a</sup>, Olivier Silvie<sup>a</sup>

7  
8 <sup>a</sup> Sorbonne Université, INSERM, CNRS, Centre d'Immunologie et des Maladies Infectieuses,  
9 CIMI-Paris, F-75013, Paris, France.

10 <sup>b</sup> Université de Paris, UMR 261 MERIT, IRD, F-75006 Paris, France.

11 <sup>c</sup> Sorbonne Université, INSERM, Unité de recherche sur les maladies cardiovasculaires, le  
12 métabolisme et la nutrition, ICAN, F-75013 Paris, France.

13 <sup>d</sup> Sorbonne Université, INSERM, Centre de Recherche de St-Antoine, F-75012, Paris, France.

14 <sup>e</sup> CIRI – Centre International de Recherche en Infectiologie, Univ Lyon, Université Claude  
15 Bernard Lyon 1, Inserm, U1111, CNRS, UMR5308, ENS Lyon, F-69007, Lyon, France.

16

17

18 **Corresponding author: Olivier Silvie ; [olivier.silvie@inserm.fr](mailto:olivier.silvie@inserm.fr)**

19

20 **Running title:** SR-B1 structure and *Plasmodium* infection

21

22 **ABSTRACT**

23           Sporozoite forms of the malaria parasite *Plasmodium* are transmitted by mosquitoes  
24 and first infect the liver for an initial round of replication before parasite proliferation in the  
25 blood. The molecular mechanisms involved during sporozoite invasion of hepatocytes  
26 remain poorly understood. Two receptors of the Hepatitis C virus (HCV), the tetraspanin  
27 CD81 and the scavenger receptor class B type 1 (SR-B1), play an important role during the  
28 entry of *Plasmodium* sporozoites into hepatocytic cells. In contrast to HCV entry, which  
29 requires both CD81 and SR-B1 together with additional host factors, CD81 and SR-B1 operate  
30 independently during malaria liver infection. Sporozoites from human-infecting *P.*  
31 *falciparum* and *P. vivax* rely respectively on CD81 or SR-B1. Rodent-infecting *P. berghei* can  
32 use SR-B1 to infect host cells as an alternative pathway to CD81, providing a tractable model  
33 to investigate the role of SR-B1 during *Plasmodium* liver infection. Here we show that mouse  
34 SR-B1 is less functional as compared to human SR-B1 during *P. berghei* infection. We took  
35 advantage of this functional difference to investigate the structural determinants of SR-B1  
36 required for infection. Using a structure-guided strategy and chimeric mouse/human SR-B1  
37 constructs, we could map the functional region of human SR-B1 within apical loops,  
38 suggesting that this region of the protein may play a crucial role for interaction of sporozoite  
39 ligands with host cells and thus the very first step of *Plasmodium* infection.

40

41

42

43

44

45 **IMPORTANCE**

46 Malaria is caused by *Plasmodium* parasites and remains one of the deadliest parasitic  
47 diseases worldwide. The parasite is transmitted by a blood feeding mosquito and first  
48 invades the liver for an initial, obligatory and silent round of replication. The liver infection  
49 is an attractive target for antimalarial vaccine strategies, however the molecular mechanisms  
50 of parasite invasion of hepatocytes remain to be fully elucidated. Two hepatocyte surface  
51 proteins are known to be important for parasite entry into hepatocytes, the tetraspanin CD81  
52 and the scavenger receptor class B type 1 (SR-B1). These receptors constitute independent  
53 gateways depending on the *Plasmodium* species. Here, we identified the structural  
54 determinants of SR-B1, an important hepatocyte entry factor for human-infecting *P. vivax*.  
55 This study paves the way toward a better characterization of the molecular interactions  
56 underlying the crucial early stages of infection, a pre-requisite for the development of novel  
57 malaria vaccine strategies.

58

59

60

61

62

63

64

65

66

67

## 68 INTRODUCTION

69 Despite progress in malaria control over the last two decades, *Plasmodium* parasites  
70 continue to cause more than 200 million cases every year (1). After their inoculation into the  
71 skin by infected *Anopheles* mosquitoes, *Plasmodium* sporozoites rapidly migrate to the liver  
72 using gliding motility and cell traversal activity. Once in the liver, they first traverse  
73 hepatocytes before invading them and developing into exo-erythrocytic forms (EEFs),  
74 surrounded by a parasitophorous vacuole (PV) membrane. Inside the PV, they differentiate  
75 into thousands of merozoites, which are released into the blood circulation and invade red  
76 blood cells, provoking the symptomatic phase of the disease.

77 Several host and parasite factors implicated in sporozoite invasion have been  
78 identified but the underlying molecular interactions remain unknown. Human and murine  
79 parasites share similar invasion routes, with two distinct invasion pathways that depend on  
80 the tetraspanin CD81 or the scavenger receptor class B type 1 (SR-B1) (2–5). The human  
81 parasite *P. falciparum* and the murine parasite *P. yoelii* both require CD81 (3), whereas *P.*  
82 *vivax* enters human hepatocytes using SR-B1 (4). Interestingly, the murine parasite *P. berghei*  
83 can invade cells using either CD81 or, alternatively, a SR-B1-dependent route in the absence  
84 of CD81 (4). Whilst SR-B1 is the only known hepatocyte entry factor for *P. vivax* sporozoites,  
85 studying this parasite remains difficult, notably due to the limited access to infected  
86 mosquitoes. In this context, *P. berghei* provides an attractive model to investigate the role of  
87 SR-B1 during sporozoite infection.

88 SR-B1 is a highly glycosylated transmembrane protein that belongs to the CD36  
89 family, which also includes CD36 and the lysosomal integral membrane protein 2 (LIMP-2).  
90 A tertiary structure of SR-B1 was predicted using LIMP-2 crystal structure as a template (6).

91 SR-B1 possesses two transmembrane regions, cytoplasmic N- and C-termini, and a large  
92 extracellular domain constituted by a  $\beta$ -strand tunnel topped by a helical bundle (6, 7). SR-  
93 B1 apical helices are involved in the binding of high density lipoproteins (HDLs) (8). The  
94 hydrophobic cavity traversing the entire protein is implicated in a selective lipid transfer  
95 with cholesteryl ester bidirectional exchanges between HDLs and the cell membrane (8, 9).

96 In this study, we show that murine SR-B1 poorly supports *P. berghei* infection as  
97 compared to its human counterpart. We took advantage of this functional difference to study  
98 the structural determinants of the SR-B1 receptor in *Plasmodium* invasion, using a structure-  
99 guided strategy based on chimeric constructs combining mouse and human SR-B1 domains.

100

101 **RESULTS**

102 **CRISPR-Cas 9 mediated inactivation of CD81 abrogates *P. berghei* infection in Hepa1-6**  
103 **cells.**

104 The murine hepatoma Hepa1-6 cells express CD81 but not SR-B1 (4). In these cells, *P.*  
105 *berghei* sporozoite infection thus occurs via a CD81-dependent route exclusively, and can be  
106 blocked by CD81-specific antibodies or siRNA (10). To corroborate these results, we  
107 generated a Hepa1-6 cell line deficient for murine CD81 (CD81 knockout (KO) Hepa1-6 or  
108 CD81KOH16) using the CRISPR-Cas9 system. Abrogation of cell surface and total CD81  
109 expression in CD81KOH16 cells was confirmed by flow cytometry (**Fig 1A**) and western blot  
110 (**Fig 1B**), respectively. We then analyzed the infection phenotype of the CD81KOH16 cells  
111 using *P. berghei* sporozoites. As expected, a dramatic reduction of the percentage of *P. berghei*  
112 infected cells was observed in the CD81KOH16 cell line (**Fig 1C**). PV quantification by  
113 microscopy after staining of UIS4, a PV membrane marker, revealed a complete inhibition of  
114 productive infection in CD81KOH16 cells (**Fig 1D**). Intranuclear UIS4-negative parasites  
115 were observed in the CD81-deficient cells, contrasting with the well-developed EEFs with a  
116 strong UIS4 staining found in the parental Hepa1-6 cells (**Fig 1E**). We have shown before that  
117 intranuclear parasites result from sporozoites arrested during cell traversal (11). The  
118 residual intracellular parasite population observed by flow cytometry in the KO cells (**Fig 1C**)  
119 thus likely corresponds to non-productive invasion associated with cell traversal. The  
120 CD81KOH16 cell line, which lacks CD81 and has lost susceptibility to *P. berghei* infection, thus  
121 provides a suitable tool to investigate SR-B1 function through genetic complementation  
122 experiments.

123

124 **Human and murine SR-B1 differ in their ability to support *P. berghei* sporozoite**  
125 **infection.**

126 We have previously shown that the ectopic expression of human SR-B1 can restore *P.*  
127 *berghei* infection in Hepa1-6 cells where CD81 expression has been previously silenced with  
128 siRNA (4). Here, we compared the functionality of SR-B1 proteins from human and mouse  
129 origins (hereinafter referred as hSR-B1 and mSR-B1, respectively) during *P. berghei* infection  
130 after genetic complementation of CD81KOH16 cells. After transient cell transfection with  
131 plasmids encoding hSR-B1 or mSR-B1, we observed a similar expression of the two proteins  
132 by western blot (**Fig 2A**) and flow cytometry (**Fig 2B**). The transfected cells were then  
133 infected with GFP-expressing *P. berghei* sporozoites (PbGFP). In agreement with our  
134 previous observations in CD81-silenced cells (4), the transfection of hSR-B1 in CD81KOH16  
135 cells restored their susceptibility to *P. berghei* infection (**Fig 2C**). Unexpectedly, despite  
136 similar protein expression, mSR-B1 was not as efficient as hSR-B1 in restoring *P. berghei*  
137 infection (**Fig 2C**). We performed similar transfection experiments in the parental Hepa1-6  
138 cell line after CD81 silencing with siRNA, which confirmed the lower functionality of mSR-B1  
139 protein during *P. berghei* sporozoite infection as compared to hSR-B1 (**Fig 2D**).

140 To analyze whether the poor functionality of mSR-B1 was specific to hepatoma cells,  
141 we performed additional experiments in primary mouse hepatocytes. A previous study  
142 showed similar *P. berghei* infection rates in SR-B1<sup>-/-</sup> and WT mice (2). However, the presence  
143 of a functional CD81 pathway would explain why *P. berghei* can infect the liver despite the  
144 absence of SR-B1. We thus performed infection experiments in primary hepatocytes isolated  
145 from WT or transgenic C57BL/6J mice harboring a Cre-mediated SR-B1 gene inactivation  
146 specifically in the liver (12), while using the neutralizing anti-CD81 monoclonal antibody

147 MT81 to block the CD81 entry route (13). CD81 inhibition did not impede *P. berghei* infection  
148 of SR-B1-deficient hepatocytes, but, at the opposite, substantially increased the infection rate,  
149 similarly to WT hepatocytes (**Fig 2E**). This enhancing effect of anti-CD81 antibodies on *P.*  
150 *berghei*-infection has been reported before in C57BL/6 mouse hepatocyte cultures, but the  
151 underlying mechanism remains unknown (10). Altogether, these results support the  
152 hypothesis that mouse SR-B1 does not play a prominent role during *P. berghei* sporozoite  
153 invasion in the mouse liver, and suggest that, in addition to CD81, other yet unidentified host  
154 proteins are implicated.

155  
156 **Human and mouse SR-B1 protein sequence analysis and structure-homology**  
157 **modeling.**

158 We next investigated the structural basis that could explain the differential functionality  
159 between human and mouse SR-B1 during *P. berghei* sporozoite invasion. hSR-B1 (isoform 1)  
160 contains 509 amino acids (AA) and presents a large extracellular domain (404 AA) flanked  
161 by two transmembrane domains (both 23 AA) and two cytoplasmic tails (N-terminal: 12 AA;  
162 C-terminal: 47 AA) (6). The modeling of hSR-B1 using CD36 as a template (PDB ID: 5lgd) (7)  
163 shows that the extracellular part of the receptor can be divided into three regions: a N-  
164 terminal region (AA 36-136) harboring a thrombospondin-binding domain in the  
165 homologous CD36 protein (14), an apical region (AA 137-214) consisting of four alpha  
166 helices ( $\alpha$ 4, 5, 6 and 7), and a large C-terminal region (AA 215-439) contributing to the  
167 hydrophobic channel (**Fig 3A, C**). The pairwise sequence alignment of hSR-B1 and mSR-B1  
168 showed that the N-terminal and C-terminal extracellular regions were the most similar, with  
169 81.1% and 85.7% identity, respectively, whilst the apical domain is more divergent, with



170 66.2% identity (**Fig 3C and D**). The hSR-B1 protein harbors 9 N-glycosylation sites, against  
171 11 sites for mSR-B1 (15) (**Fig 3C**). The superposition of hSR-B1 and mSR-B1 structural  
172 models revealed differences for two loops at the very top of the apex, between the  $\alpha 4$  and  $\alpha 5$   
173 helices and after the  $\alpha 7$  helix (**Fig 3B**). We also observed differences in the electrostatic  
174 surface potentials in this area (**Fig 3E**). When the structure is orientated in a side view to  
175 present its hydrophobic tunnel entrance, the apex lateral surface of mSR-B1 seems to be  
176 mainly electropositive whereas electronegativity is predominant in the human model (**Fig**  
177 **3E**). Remarkably, whilst the top of the apical surface is strictly neutral to electropositive in  
178 hSR-B1, mSR-B1 displays a dense electronegative region (**Fig 3E**).

179

#### 180 **The apical domain of SR-B1 plays a crucial role during *P. berghei* infection**

181 To determine whether the predicted structural differences at the apical domain of SR-B1  
182 could explain the differential functionality of human and mouse SR-B1, we analyzed the  
183 functional properties of two chimeric constructs made of human and mouse sequences of SR-  
184 B1. The ApicalH chimera corresponds to a mSR-B1 backbone protein with a human apical  
185 region (AA 137-214) (**Fig 4A, B**). Reciprocally, the ApicalM chimera corresponds to a hSR-B1  
186 protein bearing a murine Apical region (**Fig 4A,B**). The electrostatic surface potentials of  
187 ApicalH and ApicalM apex top are similar to human and mouse SR-B1, respectively, with only  
188 ApicalM showing a dense negatively charged region (**Fig 4C**). CD81KOH16 cells were  
189 transiently transfected with plasmids encoding hSR-B1, mSR-B1, ApicalH or ApicalM. The  
190 two chimeras were expressed at the surface of transfected cells and detected by flow  
191 cytometry using anti-human and anti-mouse SR-B1 polyclonal antibodies (**Fig 4D**). They  
192 were also detected by western blot analysis of whole cellular extracts (**Fig S1**). A slightly

193 higher band was observed in the lanes corresponding to cells transfected with mSR-B1 and  
194 ApicalH constructs a compared to hSR-B1 and ApicalM, which is likely explained by the  
195 differential glycosylation pattern of the mSR-B1 backbone (**Fig 4A**). Cells transfected with  
196 ApicalH and ApicalM constructs bound Cy5-labelled HDLs (**Supplemental Fig S2**), similarly  
197 to hSR-B1 and mSR-B1, suggesting that both chimeras are functional.

198 Transfected cells were then incubated with *P. berghei* sporozoites, and the number of  
199 infected cells was determined at 24 hours post-infection. These experiments revealed that  
200 replacement of the apex of mSR-B1 by that of hSR-B1 in ApicalH yielded a chimera with a 2-  
201 3 fold increase in *P. berghei* infection rates as compared to mSR-B1 (**Fig 4E**). At the opposite,  
202 replacement of the apex of hSR-B1 by that of mSR-B1 in the ApicalM chimera resulted in a  
203 loss of function, with infection levels similar to those observed after transfection of mSR-B1  
204 (**Fig 4E**). Altogether, these results demonstrate that the hSR-B1 apical helix bundle (AA 137-  
205 214) is functionally determinant during *P. berghei* sporozoite invasion of hepatocytic cell  
206 lines.

207

## 208 **A short portion of the apical domain of SR-B1 supports *P. berghei* infection**

209 We then sought to define more precisely the functional regions implicated in *P. berghei*  
210 infection within the apex domain. We designed three new chimeras made of a mSR-B1  
211 backbone harboring short hSR-B1 sequences, based on both the amino acid differences  
212 between the mouse and the human sequences, and the putative interacting sites in other  
213 CD36 family receptors. The D1 chimera (AA 150-164) includes the loop between the  $\alpha 4$  and  
214  $\alpha 5$  helices, where the Enterovirus 71 interacting site is located in the SR-B1 homolog LIMP-  
215 2, and encompasses a large part of the  $\alpha 5$  helix including the PfEMP1-interacting site in CD36

216 **(Fig 5A-B)**. The D2 chimera (AA 193-203) comprises the external tip of the  $\alpha 7$  helix but also  
217 three phenylalanine residues in the downstream loop, exclusively present in the human  
218 sequence **(Fig 5A-B)**. The D3 chimera (AA 201-211) includes only one of these phenylalanine  
219 residues **(Fig 5A-B)**. The predicted electrostatic surface potential of D1 and D3 apex top is  
220 similar to mSR-B1 **(Fig 5C)**, whereas D2 apex is mostly electropositive, like hSR-B1, with no  
221 mark of electronegativity.

222         After the transient transfection of CD81KOH16 cells, D1, D2, and D3 chimeras were all  
223 detected by flow cytometry on the cell surface using the “ $\alpha M$ ” antibody. Interestingly, only  
224 D2 was detected by the “ $\alpha H$ ” antibody, similarly to hSR-B1 and ApicalH proteins **(Fig 5D)**.  
225 Infection of the transfected cells with *P. berghei* sporozoites revealed that replacement of the  
226 AA 193-203 sequence of mSR-B1 by that of hSR-B1 in the D2 chimera resulted in a 2-fold  
227 increase in *P. berghei* infection in CD81KOH16 cells **(Fig 5E)**. In contrast, replacement of the  
228 AA 150-164 or AA 201-211 sequences in the D1 and D3 chimera, respectively, did not  
229 increase infection as compared to mSR-B1 **(Fig 5E)**. These results thus highlight the  
230 functional importance of a short 11 amino acid sequence within the hSR-B1 apical domain,  
231 which is sufficient to promote efficient *P. berghei* infection.

232

### 233 **The lipid transfer activity of human SR-B1 is not required for *P. berghei* infection**

234         SR-B1 mediates selective efflux and uptake of cholesteryl esters between the plasma  
235 membrane and HDLs (16), which is mediated by SR-B1 hydrophobic channel that spans the  
236 entire length of the molecule (6). Rodrigues *et al.* reported that block lipid transport (BLT)  
237 inhibitors, which block the lipid transfer activity of SR-B1, inhibit both the entry and the  
238 development of *P. berghei* inside Huh7 cells (2). We therefore sought to determine whether

239 in addition to the apical domain, the SR-B1 lipid transfer activity is also involved during SR-  
240 B1-dependent *P. berghei* infection of HepG2 cells. We observed an inhibition of *P. berghei*  
241 invasion in HepG2 cells when sporozoites were co-incubated with a 20  $\mu$ M concentration of  
242 BLT-1 (**Fig 6A**). However, the same inhibition was also observed in Hepa1-6 cells lacking SR-  
243 B1 receptor (**Fig 6C**). Pre-incubation of cells with BLT inhibitors before sporozoite  
244 inoculation caused no inhibition of infection in any of the cell lines tested (**Fig 6B and 6D**).  
245 BLT-1 at high concentration also blocked sporozoite cell traversal activity, monitored by  
246 dextran-rhodamine cellular uptake (**Fig S3**). These data strongly suggest that the inhibition  
247 caused by BLT1 is due to the toxicity of the compound on sporozoites, rather than blockage  
248 of SR-B1 function. In favor of this hypothesis, another BLT inhibitor, BLT-4, had no effect on  
249 either cell traversal or invasion by *P. berghei* sporozoites (**Fig 6A-D and Fig S2**).

250 Altogether, these data indicate that the apical domain but not the lipid transfer activity of  
251 SR-B1 is important during *P. berghei* sporozoite entry.

252

253 **DISCUSSION**

254 Previous studies highlighted the dual role of SR-B1 during *Plasmodium* sporozoite  
255 invasion and intracellular liver stage development (2, 5). More recently, we have shown that  
256 SR-B1 is an important host factor for *P. vivax* but not for *P. falciparum* infection, and that *P.*  
257 *berghei* sporozoites can use hSR-B1 as an alternative entry route to the CD81-dependent  
258 pathway (4). *P. berghei* is a rodent-infecting parasite, yet *P. berghei* sporozoites can readily  
259 infect human hepatocytic cells, using either a CD81 or a SR-B1 entry route (4). Here, we show  
260 that mSR-B1, in contrast to its human counterpart, does not support efficient *P. berghei*  
261 sporozoite invasion of hepatocytic cells. *P. berghei* was originally isolated from the African  
262 tree rat *Grammomys surdaster*, and artificially introduced for scientific purposes in the  
263 domestic mouse *Mus musculus* (17). We cannot exclude that SR-B1 function during  
264 *Plasmodium* infection may vary depending on the rodent host. In previous studies, we  
265 reported that *P. berghei* sporozoites readily infect CD81-deficient mouse hepatocytes *in vivo*  
266 and *in vitro* (3, 10), supporting the existence of alternative entry pathways. Whilst SR-B1  
267 provides a CD81-independent route for *P. berghei* in human hepatocytic cells (4), we report  
268 here that concomitant blockage of murine CD81 and SR-B1 receptors does not prevent *P.*  
269 *berghei* infection in primary mouse hepatocyte cultures. These results support the existence  
270 of alternative entry routes for the parasite, which still remain to be identified. Possible  
271 candidate host receptors include the SR-B1-related proteins CD36 and LIMP-2. Although  
272 LIMP-2 is predominantly expressed in lysosomes, a fraction of the protein pool localizes at  
273 the cell plasma membrane, where LIMP-2 acts as a receptor that mediates the Enterovirus 71  
274 host cell entry (18, 19). LIMP-2 role during *Plasmodium* infection has not been investigated  
275 so far. At the opposite, CD36 is known to play major roles during malaria infection. CD36

276 binds PfEMP1 variants expressed at the surface of *P. falciparum*-infected erythrocytes, and  
277 contributes to the cytoadherence of *P. falciparum* to vascular endothelial cells (20–22). It is  
278 also a major receptor for tissue sequestration of *P. berghei*-infected erythrocytes in mice (23).  
279 A previous study investigated the contribution of CD36 during *P. yoelii* and *P. berghei*  
280 sporozoite infection, using CD36-deficient mice. The data showed that both parasites could  
281 still infect hepatocytes in the absence of CD36 (24). However, in these experiments, the  
282 presence of a functional CD81-entry pathway could have masked any important role of CD36.  
283 Hence the contribution of CD36 and LIMP-2 deserves further investigation.

284 We took advantage of the differential functionality between human and murine SR-B1  
285 to investigate the SR-B1 molecular determinants involved during *P. berghei* infection. Using  
286 a series of complementary chimeras designed through a structure-guided strategy, we  
287 demonstrate here the critical role of an 11 amino acid domain within hSR-B1 apical helices  
288 (AA 193 to 203) during *P. berghei* sporozoite infection. This is consistent with CD36 family  
289 proteins typically binding to a variety of ligands via their helical bundle. For instance, the  $\beta$ -  
290 glucocerebrosidase binds to LIMP-2 apical domain to be delivered into the lysosome (25).  
291 Binding of Enterovirus 71 depends on a 7 amino acid sequence (AA 144-151) in LIMP-2 (18,  
292 26). Furthermore, an apical phenylalanine of CD36 (F153) binds to *Plasmodium* PfEMP1 (7).  
293 These sites can be mapped on the SR-B1 predicted structure at the intersection between the  
294  $\alpha$ 4 and  $\alpha$ 5 helices, at the very top of the apex. This crucial phenylalanine is replaced by a  
295 threonine in hSR-B1, and no other phenylalanine residue seems close to this area in the  
296 tertiary structure (**Fig 3D**). Interestingly, the 11 amino acid hSR-B1 functional domain we  
297 have identified contains 3 phenylalanine residues and can be mapped in the same region at  
298 the top of the apex but at a distinct site in the SR-B1 model (**Fig 3B**).

299 Our data indicate that the differential activity of human and murine SR-B1 is not due  
300 to the N- or C-terminal regions of SR-B1 ectodomain, which participate in the hydrophobic  
301 channel mediating the lipid transfer. Furthermore, we did not observe any specific inhibition  
302 of SR-B1-dependent infection by BLT inhibitors. Taken together, our data suggest that the  
303 lipid transfer activity of SR-B1 is not involved during *P. berghei* sporozoite infection. Rather,  
304 we speculate that the apical helical domain of the protein may serve as a receptor for a  
305 hitherto unidentified sporozoite ligand. The dense electronegative spot at the apex of mSR-  
306 B1 and of poorly functional chimeras (ApicalM, D1 and D3), which is absent in hSR-B1 and  
307 functional chimeras (ApicalH and D2), may be unfavourable for the binding to this putative  
308 ligand. One candidate is the 6-cysteine domain protein P36, which is required for sporozoite  
309 productive invasion of hepatocytes, and is functionally linked to host receptor usage. In  
310 particular, we have shown that *P. yoelii* sporozoites genetically complemented with P36  
311 protein from *P. berghei* can infect host cells through a SR-B1-dependent pathway (4).  
312 Whether P36 protein from *P. berghei* or from the medically-relevant *P. vivax* binds to the  
313 apical helix bundle of SR-B1 remains to be determined.

314 In conclusion, this study provides new insights into the function of SR-B1 during  
315 malaria infection, and paves the way towards a better characterization of the molecular  
316 interactions leading to parasite entry into hepatocytes. Our results may be particularly  
317 relevant to *P. vivax* malaria, as SR-B1 is the first and up to now only known host entry factor  
318 for *P. vivax* sporozoites (4). The characterization of SR-B1 molecular function and the  
319 identification of interacting parasite ligands may lead to the development of novel  
320 intervention strategies to prevent *P. vivax* sporozoite entry, before the establishment of the  
321 liver stage and the hypnozoite reservoir.

322

## 323 **MATERIALS AND METHODS**

### 324 ***Ethics statement***

325 All animal work was conducted in strict accordance with the Directive 2010/63/EU of the  
326 European Parliament and Council 'On the protection of animals used for scientific purposes'.  
327 Protocols were approved by the Ethical Committee Charles Darwin N°005 (approval #7475-  
328 2016110315516522).

329

### 330 ***Experimental animals, parasite and cell lines***

331 We used GFP-expressing *P. berghei* (PbGFP, ANKA strain) parasites, obtained after  
332 integration of a GFP expression cassette at the dispensable p230p locus (27). PbGFP blood  
333 stage parasites were propagated in female Swiss mice (6–8 weeks old, from Janvier Labs).  
334 *Anopheles stephensi* mosquitoes were fed on PbGFP-infected mice using standard methods  
335 (28), and kept at 21°C. PbGFP sporozoites were collected from the salivary glands of infected  
336 mosquitoes 21–28 days post-feeding. Hepa1-6 cells (ATCC CRL-1830) and HepG2 (ATCC HB-  
337 8065) were cultured at 37°C under 5% CO<sub>2</sub> in DMEM supplemented with 10% fetal calf  
338 serum (10500064, Life Technologies), L-glutamine 20 µM (25030024, Life Technologies),  
339 and 1% penicillin-streptomycin, as described (10). Primary mouse hepatocytes were isolated  
340 by collagenase perfusion (C5138, Sigma), as described in (29), from C57BL/6 mice harboring  
341 a Cre-mediated SR-B1 gene inactivation specifically in the liver (12). Primary hepatocytes  
342 were seeded at confluency in 96 well plates and cultured at 37 °C in 4% CO<sub>2</sub> in William's E  
343 medium (22551022, Life Technologies) with 10% fetal calf serum, 1% penicillin-  
344 streptomycin (15140122, Life Technologies), hydrocortisone 50 µM (Upjohn laboratories



345 SERB) and 1% L-glutamine, Bovine insulin 5 µg/ml (I5500, Sigma) for 24 hours before  
346 sporozoite infection.

347

#### 348 ***Small interfering RNA silencing of CD81***

349 The siRNA oligonucleotide against CD81 (5'-CGUGUCACCUUCAACUGUA-3') was validated in  
350 previous studies (10). Transfection of siRNA oligonucleotides was performed by  
351 electroporation in presence of 10 µL of siRNA 20 µM, as described (11). Cells were cultured  
352 during 48 hours before infection or analysis by immunofluorescence. As negative controls,  
353 we used cells electroporated in the absence of siRNA oligonucleotide.

354

#### 355 ***Generation of a CD81KOH16 cell line using CRISPR-Cas9***

356 The day before transfection, Hepa1-6 cells were plated in 24 well plates at a density of 90  
357 000 cells per well. Cells were transfected with 500 ng of LentiCrispR V2 (Addgene plasmid  
358 #52961) containing a guide RNA targeting mouse CD81 (GCAACCACAGAGCTACACCT) using  
359 Lipofectamine 2000 (11668027, Life Technologies). Puromycin selection was carried out 36  
360 hours after transfection using a 5 µg/ml solution. Cells were exposed to puromycine for 48  
361 hours, then washed and expanded for two weeks in complete medium before analysis.  
362 Immunostaining was performed using the rat monoclonal antibody MT81 to label mouse  
363 CD81 (Silvie et al., 2006a). All incubations were performed at 4°C during one hour. We used  
364 AlexaFluor-488 Goat anti-rat antibody (A1106, Life technologies) as a secondary antibody.  
365 Cells were then fixed with 1% formaldehyde solution and analyzed using a Guava EasyCyte  
366 6/2L bench cytometer equipped with 488 nm and 532 nm lasers (Millipore).

367

### 368 ***Homology modeling of SR-B1 chimeras***

369 The SR-B1 amino acid sequence of *H. sapiens* (Uniprot: Q8WTV0) was submitted to the  
370 HHpred interactive server for remote protein homology detection (30). The server identified  
371 the X-ray structure of the scavenger receptor CD36 (PDB ID: 5lgd) at 2.07 Å resolution (7) as  
372 the best template to model the SR-B1 protein (probability: 100%, e-value: 2.3e-91).  
373 Sequences of SR-B1 chimeras were aligned and modeled using Swiss-Model through the  
374 ExPASy molecular biology suite (31). Each SR-B1 model was then subjected to loop  
375 refinement and energy minimization using GalaxyRefine (32) and YASARA (33), respectively.  
376 SR-B1 models were validated for quality using MolProbity for local stereochemistry (34), and  
377 Prosa II for global 3D quality metrics (35). Additionally, we validated the structure by  
378 checking that all the N-glycosylation sites were solvent-exposed.

379 The protein electrostatic surface potential was calculated using Adaptive Poisson-  
380 Boltzmann Solver (APBS) (36), after determining the per-atom charge and radius of the  
381 structure with PDB2PQR v.2.1.1 (37). The Poisson-Boltzmann equation was solved at 298 K  
382 using a grid-based method, with solute and solvent dielectric constants fixed at 2 and 78.5,  
383 respectively. We used a scale of -2 kT/e to +2 kT/e to map the electrostatic surface potential  
384 in a radius of 1.4 Å. All molecular drawings were produced using UCSF Chimera (38).

385

### 386 ***SR-B1 chimeric construct design and plasmid transfection***

387 Plasmids encoding human and mouse SR-B1 have been described previously (39, 40). The  
388 ApicalH and ApicalM chimera were obtained by cloning a single insert amplified from  
389 chimeric synthetic genes (Eurofins Genomics) into the mSR-B1 and hSR-B1 plasmids,  
390 respectively. The D1, D2 and D3 chimera were generated by inserting into the mSR-B1

391 plasmid two fragments amplified with primers containing hSR-B1 sequences. The sequence  
392 of all oligonucleotides used to amplify DNA inserts and the sequence of synthetic genes used  
393 as templates are indicated in Supplemental Table 1. Information on plasmid sequence is  
394 available on demand. All cloning steps were performed using In-fusion cloning kit (639649,  
395 Ozyme) and controlled by Sanger sequencing (Eurofins genomics). High concentration  
396 plasmid solutions were produced using XL1-Blue Competent Cells (200249, Agilent  
397 technology) and plasmid extraction was performed using Qiagen Plasmid Maxikit (12163,  
398 QIAGEN) according to the manufacturer's recommendations. Transfection of SR-B1 or  
399 chimeras encoding plasmids was performed 24 hours after siRNA electroporation, or directly  
400 on CD81KOH16 cells, using the Lipofectamine 2000 reagent (11668027, Life Technologies)  
401 according to the manufacturer's specifications. Following plasmid transfection, cells were  
402 cultured for an additional 24 hours before sporozoite infection or protein expression  
403 analysis.

404

#### 405 ***Western blot***

406 After cell lysis in 1% NP-40, soluble fractions were analyzed by western blot under non-  
407 reducing conditions, using a Biorad Mini-Protean® electrophoresis chamber for SDS-PAGE  
408 and transfer on polyvinylidene fluoride (PVDF) membranes. Membranes were probed with  
409 anti-mouse CD81 MT81 (13) at 2 µg/ml, anti-mSR-B1 polyclonal antibody (Ab24603) diluted  
410 at 0.9 µg/ml, and anti-mouse GAPDH (TAB1001) as a loading control (0.5 µg/ml).  
411 Chemiluminescence detection was performed using ECL Prime reagents (RPN2232,GE  
412 healthcare Life sciences) and an ImageQuant LAS 4000 system (GE Healthcare).

413

414 ***Immunofluorescence assays***

415 For the immunolabeling of SR-B1 and chimeric proteins, cells were harvested using an  
416 enzyme-free Cell Dissociation buffer (13151014, Thermofisher). All incubations were  
417 performed at 4°C in PBS/BSA 3% during one hour with either “αH” anti-SR-B1 polyclonal  
418 rabbit serum (40) or “αM” anti-SR-B1 polyclonal rabbit antibodies NB400-113 (Novus  
419 Biological). We used AlexaFluor-488 Donkey anti-rabbit antibody (Ab150073, Life  
420 technologies) as secondary antibody with a 45 minutes incubation. After fixation in 1%  
421 formaldehyde, cells were analyzed using a Guava EasyCyte 6/2L bench cytometer equipped  
422 with 488 nm and 532 nm lasers (Millipore). Flow cytometry plots are representative of at  
423 least three independent experiments.

424

425 ***In vitro infection assays***

426 Hepa1-6 cells were seeded in 96 well plates ( $2 \times 10^4$  per well seeded the day before  
427 transfection) and incubated with  $1 \times 10^4$  PbGFP sporozoites for 3 hours, washed, and further  
428 cultured until 24 hours post-infection. HepG2 and HepG2/CD81, plated in 96 well plates with  
429  $3 \times 10^4$  cells per well seeded the day before infection, were infected using  $5 \times 10^3$  PbGFP  
430 sporozoites. In some experiments, anti-mouse CD81 MT81 at 20 µg/ml (13), BLT-1  
431 (SML0059, Sigma), BLT-4 (SML0512, Sigma) (both prepared in pure DMSO) or diluted DMSO,  
432 were added to sporozoites during infection. For the dextran assay, 0.5 mg/ml rhodamine-  
433 conjugated dextran (Life technologies) was added to sporozoites during infection. Infected  
434 cultures were then either trypsinized for detection of GFP-positive cells and/or dextran-  
435 positive cells by flow cytometry on a Guava EasyCyte 6/2L bench cytometer (Millipore), or

436 fixed with 4% paraformaldehyde and analyzed by fluorescence microscopy after labeling  
437 with antibodies specific for UIS4 (Sicgen) and the nuclear stain Hoechst 33342.

438  
439 **HDL binding assay**  
440 Human HDL lipoproteins (LP3, Calbiochem) were labeled using the Cy5 monoreactive Dye  
441 pack (PA25001, GE Healthcare) and filtered using Illustra microspin G25 columns  
442 (27532501, GE Healthcare). CD81KOH16 cells were dissociated at 24 hours post-transfection  
443 using an enzyme-free Cell dissociation buffer (13151014, Thermofisher) and incubated with  
444 Cy5 labeled HDLs (5 µg/ml) for 20 minutes at 37°C. After washing, they were incubated with  
445 Suramin (574625, Merck Millipore) at 10mg/ml for one hour at 4°C. HDL binding to SR-B1  
446 and chimeras was then evaluated by flow cytometry using the BD LSR Fortessa™.

447  
448 **Statistical analyses**  
449 Statistical analyses were performed with GraphPad Prism on at least three independent  
450 experiments, each performed in triplicates, as indicated in the legend to the figures. All  
451 graphs show the mean ± SEM (unless otherwise indicated) expressed as percentage of  
452 control (WT cells or CD81KOH16 cells transfected with hSR-B1, as indicated).

453  
454 **ACKNOWLEDGMENTS**  
455 We thank Jean-François Franetich, Maurel Tefit, Mariem Choura and Thierry Houpert for  
456 rearing of mosquitoes and technical assistance, and Drs Maryse Lebrun and Jérôme Clain for  
457 fruitful discussions. This work was funded by the European Union (FP7 PathCo Collaborative  
458 Project HEALTH-F3-2012-305578), the Laboratoire d'Excellence ParaFrap (ANR-11-LABX-

459 0024), and the Agence Nationale de la Recherche (ANR-16-CE15-0004). GM was supported  
460 by a “DIM Malin” doctoral fellowship awarded by the Conseil Régional d'Ile-de-France.  
461

462 **REFERENCES**

- 463 1. World Health Organization. 2019. World Malaria Report 2019 1–232.
- 464 2. Rodrigues CD, Hannus M, Prudencio M, Martin C, Goncalves LA, Portugal S, Epiphanio  
465 S, Akinc A, Hadwiger P, Jahn-Hofmann K, Rohl I, van Gemert GJ, Franetich JF, Luty AJ,  
466 Sauerwein R, Mazier D, Koteliansky V, Vornlocher HP, Echeverri CJ, Mota MM. 2008.  
467 Host scavenger receptor SR-BI plays a dual role in the establishment of malaria  
468 parasite liver infection. *Cell Host Microbe* 4:271–282.
- 469 3. Silvie O, Rubinstein E, Franetich JF, Prenant M, Belnoue E, Rénia L, Hannoun L, Elings  
470 W, Levy S, Boucheix C, Mazier D. 2003. Hepatocyte CD81 is required for *Plasmodium*  
471 *falciparum* and *Plasmodium yoelii* sporozoite infectivity. *Nat Med* 9:93–96.
- 472 4. Manzoni G, Marinach C, Topçu S, Briquet S, Grand M, Tolle M, Gransagne M, Lescar J,  
473 Andolina C, Franetich JF, Zeisel MB, Huby T, Rubinstein E, Snounou G, Mazier D, Nosten  
474 F, Baumert TF, Silvie O. 2017. *Plasmodium* P36 determines host cell receptor usage  
475 during sporozoite invasion. *Elife* 6.
- 476 5. Yalaoui S, Huby T, Franetich JF, Gego A, Rametti A, Moreau M, Collet X, Siau A, van  
477 Gemert GJ, Sauerwein RW, Luty AJF, Vaillant JC, Hannoun L, Chapman J, Mazier D,  
478 Froissard P. 2008. Scavenger Receptor BI Boosts Hepatocyte Permissiveness to  
479 *Plasmodium* Infection. *Cell Host Microbe* 4:283–292.
- 480 6. Neculai D, Schwake M, Ravichandran M, Zunke F, Collins RF, Peters J, Neculai M, Plumb  
481 J, Loppnau P, Pizarro JC, Seitova A, Trimble WS, Saftig P, Grinstein S, Dhe-Paganon S.  
482 2013. Structure of LIMP-2 provides functional insights with implications for SR-BI and  
483 CD36. *Nature* 504:172–176.
- 484 7. Hsieh FL, Turner L, Bolla JR, Robinson C V., Lavstsen T, Higgins MK. 2016. The

- 485 structural basis for CD36 binding by the malaria parasite. *Nat Commun* 7.
- 486 8. Acton S, Rigotti A, Landschulz KT, Xu S, Hobbs HH, Krieger M. 1996. Identification of  
487 Scavenger Receptor SR-BI as a High Density Lipoprotein Receptor. *Science* 271:518–  
488 520.
- 489 9. Rhainds D, Brodeur M, Lapointe J, Charpentier D, Falstraalt L, Brissette L. 2003. The  
490 role of human and mouse hepatic scavenger receptor class B type I (SR-BI) in the  
491 selective uptake of low-density lipoprotein-cholesteryl esters. *Biochemistry* 42:7527–  
492 38.
- 493 10. Silvie O, Franetich JF, Boucheix C, Rubinstein E, Mazier D. 2007. Alternative invasion  
494 pathways for *Plasmodium berghei* sporozoites. *Int J Parasitol* 37:173–182.
- 495 11. Silvie O, Greco C, Franetich JF, Dubart-Kupperschmitt A, Hannoun L, van Gemert GJ,  
496 Sauerwein RW, Levy S, Boucheix C, Rubinstein E, Mazier D. 2006. Expression of human  
497 CD81 differently affects host cell susceptibility to malaria sporozoites depending on  
498 the *Plasmodium* species. *Cell Microbiol* 8:1134–1146.
- 499 12. Huby T, Doucet C, Datchet C, Ouzilleau B, Ueda Y, Afzal V, Rubin E, Chapman MJ, Lesnik  
500 P. 2006. Knockdown expression and hepatic deficiency reveal an atheroprotective role  
501 for SR-BI in liver and peripheral tissues. *J Clin Invest* 116:2767–2776.
- 502 13. Silvie O, Charrin S, Billard M, Franetich JF, Clark KL, van Gemert GJ, Sauerwein RW,  
503 Dautry F, Boucheix C, Mazier D, Rubinstein E. 2006. Cholesterol contributes to the  
504 organization of tetraspanin-enriched microdomains and to CD81-dependent infection  
505 by malaria sporozoites. *J Cell Sci* 119:1992–2002.
- 506 14. Leung LLK, Li WX, McGregor JL, Albrecht G, Howard RJ. 1992. CD36 peptides enhance  
507 or inhibit CD36-thrombospondin binding. A two-step process of ligand-receptor



- 508 interaction. *J Biol Chem* 267:18244–18250.
- 509 15. Viñals M, Xu S, Vasile E, Krieger M. 2003. Identification of the N-linked glycosylation  
510 sites on the high density lipoprotein (HDL) receptor SR-BI and assessment of their  
511 effects on HDL binding and selective lipid uptake. *J Biol Chem* 278:5325–5332.
- 512 16. Rhainds D, Brisette L. 2004. The role of scavenger receptor class B type I (SR-BI) in  
513 lipid trafficking: Defining the rules for lipid traders. *Int J Biochem Cell Biol*.
- 514 17. VINCKE IH, LIPS M. 1948. Un nouveau plasmodium d'un rongeur sauvage du Congo  
515 *Plasmodium berghei* n. sp. *Ann Soc Belg Med Trop (1920)* 28:97–104.
- 516 18. Chen P, Song Z, Qi Y, Feng X, Xu N, Sun Y, Wu X, Yao X, Mao Q, Li X, Dong W, Wan X,  
517 Huang N, Shen X, Liang Z, Li W. 2012. Molecular determinants of enterovirus 71 viral  
518 entry: Cleft around GLN-172 on VP1 protein interacts with variable region on scavenge  
519 receptor B 2. *J Biol Chem* 287:6406–6420.
- 520 19. Yamayoshi S, Yamashita Y, Li J, Hanagata N, Minowa T, Takemura T, Koike S. 2009.  
521 Scavenger receptor B2 is a cellular receptor for enterovirus 71. *Nat Med* 15:798–801.
- 522 20. Ockenhouse CF, Tandon NN, Magowan C, Jamieson GA, Chulay JD. 1989. Identification  
523 of a platelet membrane glycoprotein as a falciparum malaria sequestration receptor.  
524 *Science* 243:1469–1471.
- 525 21. Oquendo P, Hundt E, Lawler J, Seed B. 1989. CD36 directly mediates cytoadherence of  
526 *Plasmodium falciparum* parasitized erythrocytes. *Cell* 58:95–101.
- 527 22. Barnwell JW, Asch AS, Nachman RL, Yamaya M, Aikawa M, Ingravallo P. 1989. A human  
528 88-kD membrane glycoprotein (CD36) functions in vitro as a receptor for a  
529 cytoadherence ligand on *Plasmodium falciparum*-infected erythrocytes. *J Clin Invest*  
530 84:765–772.

- 531 23. Franke-Fayard B, Janse CJ, Cunha-Rodrigues M, Ramesar J, Büscher P, Que I, Löwik C,  
532 Voshol PJ, Den Boer MAM, Van Duinen SG, Febbraio M, Mota MM, Waters AP. 2005.  
533 Murine malaria parasite sequestration: CD36 is the major receptor, but cerebral  
534 pathology is unlinked to sequestration. *Proc Natl Acad Sci U S A* 102:11468–11473.
- 535 24. Sinnis P, Febbraio M. 2002. *Plasmodium yoelii* sporozoites infect CD36-deficient mice.  
536 *Exp Parasitol* 100:12–16.
- 537 25. Zunke F, Andresen L, Wessler S, Groth J, Arnold P, Rothaug M, Mazzulli JR, Krainc D,  
538 Blanz J, Saftig P, Schwake M. 2016. Characterization of the complex formed by  $\beta$ -  
539 glucocerebrosidase and the lysosomal integral membrane protein type-2. *Proc Natl*  
540 *Acad Sci U S A* 113:3791–3796.
- 541 26. Yamayoshi S, Koike S. 2011. Identification of a Human SCARB2 Region That Is  
542 Important for Enterovirus 71 Binding and Infection. *J Virol* 85:4937–4946.
- 543 27. Manzoni G, Briquet S, Risco-Castillo V, Gaultier C, Topçu S, Ivănescu ML, Franetich JF,  
544 Hoareau-Coudert B, Mazier D, Silvie O. 2014. A rapid and robust selection procedure  
545 for generating drug-selectable marker-free recombinant malaria parasites. *Sci Rep* 4.
- 546 28. Ramakrishnan C, Delves MJ, Lal K, Blagborough AM, Butcher G, Baker KW, Sinden RE.  
547 2013. Laboratory maintenance of rodent malaria parasites. *Methods Mol Biol* 923:51–  
548 72.
- 549 29. Rénia L, Mattei D, Goma J, Pied S, Dubois P, Miltgen F, Nüssler A, Matile H, Menégaux F,  
550 Gentilini M, Mazier D. 1990. A malaria heat-shock-like determinant expressed on the  
551 infected hepatocyte surface is the target of antibody-dependent cell-mediated  
552 cytotoxic mechanisms by nonparenchymal liver cells. *Eur J Immunol* 20:1445–1449.
- 553 30. Söding J, Biegert A, Lupas AN. 2005. The HHpred interactive server for protein

- 554 homology detection and structure prediction. *Nucleic Acids Res* 33.
- 555 31. Schwede T, Kopp J, Guex N, Peitsch MC. 2003. SWISS-MODEL: An automated protein  
556 homology-modeling server. *Nucleic Acids Res* 31:3381–3385.
- 557 32. Heo L, Park H, Seok C. 2013. GalaxyRefine: Protein structure refinement driven by side-  
558 chain repacking. *Nucleic Acids Res* 41.
- 559 33. Krieger E, Joo K, Lee J, Lee J, Raman S, Thompson J, Tyka M, Baker D, Karplus K. 2009.  
560 Improving physical realism, stereochemistry, and side-chain accuracy in homology  
561 modeling: Four approaches that performed well in CASP8. *Proteins Struct Funct*  
562 *Bioinforma*.
- 563 34. Chen VB, Arendall WB, Headd JJ, Keedy DA, Immormino RM, Kapral GJ, Murray LW,  
564 Richardson JS, Richardson DC. 2010. MolProbity: All-atom structure validation for  
565 macromolecular crystallography. *Acta Crystallogr Sect D Biol Crystallogr* 66:12–21.
- 566 35. Wiederstein M, Sippl MJ. 2007. ProSA-web: Interactive web service for the recognition  
567 of errors in three-dimensional structures of proteins. *Nucleic Acids Res* 35.
- 568 36. Baker NA, Sept D, Joseph S, Holst MJ, McCammon JA. 2001. Electrostatics of  
569 nanosystems: Application to microtubules and the ribosome. *Proc Natl Acad Sci U S A*  
570 98:10037–10041.
- 571 37. Dolinsky TJ, Nielsen JE, McCammon JA, Baker NA. 2004. PDB2PQR: An automated  
572 pipeline for the setup of Poisson-Boltzmann electrostatics calculations. *Nucleic Acids*  
573 *Res* 32.
- 574 38. Pettersen EF, Goddard TD, Huang CC, Couch GS, Greenblatt DM, Meng EC, Ferrin TE.  
575 2004. UCSF Chimera - A visualization system for exploratory research and analysis. *J*  
576 *Comput Chem* 25:1605–1612.

- 577 39. Thi VLD, Granier C, Zeisel MB, Guérin M, Mancip J, Granio O, Penin F, Lavillette D,  
578 Bartenschlager R, Baumert TF, Cosset FL, Dreux M. 2012. Characterization of hepatitis  
579 C virus particle subpopulations reveals multiple usage of the scavenger receptor BI for  
580 entry steps. *J Biol Chem* 287:31242–31257.
- 581 40. Maillard P, Huby T, Andréo U, Moreau M, Chapman J, Budkowska A. 2006. The  
582 interaction of natural hepatitis C virus with human scavenger receptor SR-BI/Cla1 is  
583 mediated by ApoB-containing lipoproteins. *FASEB J* 20:735–737.
- 584
- 585

586 **FIGURE LEGENDS**

587 **Figure 1. CRISPR-mediated inactivation of CD81 abrogates *P. berghei* infection in**  
588 **Hepa1-6 cells.**

589 **(A)** Hepa1-6 and CD81KOH16 cells were stained for surface CD81 with anti-CD81 MT81  
590 monoclonal antibody and fluorescent secondary antibodies, before flow cytometry analysis.  
591 Histograms represent the fluorescence intensity of extracellular CD81 proteins for WT  
592 Hepa1-6 (blue) and CD81KOH16 cells (orange). The grey histogram represents cells stained  
593 with secondary antibodies only (Control). **(B)** Western blot analysis of total CD81 protein  
594 expression in WT Hepa1-6 and CD81KOH16 cells. GAPDH was used as loading control. **(C-E)**  
595 WT Hepa1-6 and CD81KOH16 cells were infected with PbGFP sporozoites and analyzed 24  
596 hours after invasion by flow cytometry **(C)** or microscopy **(D, E)** after staining with anti-UIS4  
597 antibodies (red) and Hoechst 33342 nuclear stain (blue). The number of EEFs per well ranged  
598 from 105 to 362 (median 175) in control cells. \*\*\*\*,  $p < 0.0001$  (ratio paired *t* test). The images  
599 show PbGFP EEFs (green) surrounded by a UIS4-positive PV membrane (red) or intranuclear  
600 parasites in CD81KOH16 cells. Scale bar, 10  $\mu$ m.

601

602 **Figure 2. Mouse SR-B1 is poorly functional during *P. berghei* sporozoite invasion.**

603 **(A-B)** CD81KOH16 cells were transfected with either mouse or human SR-B1 plasmids, or no  
604 plasmid as a control (Mock). Total protein expression was analyzed using polyclonal anti-SR-  
605 B1 antibodies (Ab24603) by western blot **(A)** with GAPDH as a loading control. Surface  
606 protein expression was analyzed by flow cytometry **(B)** using anti-human “ $\alpha$ -H” SR-B1  
607 polyclonal rabbit serum (blue) and anti-mouse “ $\alpha$ -M” polyclonal antibodies NB400-113  
608 (orange). The grey histogram represents stained untransfected cells with the corresponding

609 antibody. **(C-D)** CD81KOH16 **(C)** and WT Hepa1-6 cells treated with siRNA against CD81 24  
610 hours before **(D)**, were transfected with mouse or human SR-B1 plasmids, or no plasmid as a  
611 negative control (Mock), and then infected with PbGFP sporozoites. EEFs numbers were  
612 counted by microscopy after UIS4 staining at 24 hours after sporozoite addition. The number  
613 of EEFs per well ranged from 43 to 334 (median 169) in hSR-B1-transfected cells **(C)**, and  
614 from 19 to 300 (median 94) in control WT cells **(D)**. \*,  $p < 0.05$ ; \*\*,  $p < 0.01$  (repeated measures  
615 one-way ANOVA followed by Tukey's multiple comparisons test). **(E)** Primary hepatocytes  
616 isolated from WT or SR-B1 deficient C57BL/6 mice were infected with PbGFP sporozoites in  
617 the absence or presence of neutralizing anti-mCD81 mAb MT81, and cultured for 24 hours  
618 before EEFs quantification. \*,  $p < 0.05$  (ratio paired *t* test).

619

### 620 **Figure 3. SR-B1 modeling identifies potential functional regions.**

621 **(A)** Predicted tertiary structure of hSR-B1 extracellular domain by homology modeling using  
622 CD36 (PDB ID: 5lgd) as a template, with the three regions referred to as “N-terminal” (green),  
623 “apex” (red) and “C-terminal” (black). **(B)** A close-up view of structural alignment of the  
624 apical helix bundle of mouse (orange) and human (blue) SR-B1, with their four alpha helices  
625 ( $\alpha 4$  to  $\alpha 7$ ). The main structural differences are circled in black. **(C)** Schematic representation  
626 of SR-B1 N-glycosylation sites on human (blue) and mouse (orange) proteins. Two  
627 determinant sites for SR-B1 structure and function are in red (Asn 108 and 173), mouse  
628 specific sites are in yellow (Asn 116 and 288) and conserved sites are in blue. SR-B1 model is  
629 a schematic representation of the delineated regions (“N-terminal” (green), “apex” (red), “C-  
630 terminal” (black)) in SR-B1 protein displaying all potential N-glycosylation sites. **(D)** Pairwise  
631 sequence alignment of mSR-B1 and hSR-B1 proteins for the 132-223 apical region with

632 corresponding predicted human secondary structure (alpha helices in red and beta strand in  
633 blue). Identical, similar and different amino acids are represented in black, blue and red  
634 respectively. The threonine residue position corresponding to PfEMP1 binding phenylalanine  
635 in CD36 homolog is highlighted in purple. The residues in SR-B1 equivalent to Enterovirus-  
636 interacting site in LIMP2 are highlighted in green and purple. **(E)** Electrostatic surface  
637 potential of mSR-B1 and hSR-B1 extracellular domain from side and top views. Values are in  
638 units of kT/e at 298 K, on a scale of -2 kT/e (red) to +2 kT/e (blue). White color indicates a  
639 neutral potential. The black circle highlights a differential electrostatic surface potential  
640 between mSR-B1 and hSR-B1 at the top of the “apex” region.

641

642 **Figure 4. The apical domain of SR-B1 plays a crucial role during *P. berghei* infection.**

643 **(A)** Schematic representation of the ApicalH and ApicalM chimeric constructs. **(B)** Predicted  
644 tertiary structure of ApicalH and ApicalM chimeras by homology modeling, highlighting the  
645 portions of mouse (orange) or human (blue) origins. **(C)** Top views of the electrostatic surface  
646 potential of ApicalH and ApicalM chimeras’ apex. Values are in units of kT/e at 298 K, on a  
647 scale of -2 kT/e (red) to +2 kT/e (blue). White color indicates a neutral potential. The black  
648 circle highlights a differential electrostatic surface potential between the two chimeric  
649 constructs at the top of the “apex” region. **(D)** CD81KOH16 cells were transfected with hSR-  
650 B1, mSR-B1, ApicalH or ApicalM chimera plasmids, or no plasmid as a control (Mock). Protein  
651 surface expression was analyzed using anti-hSR-B1 (“ $\alpha$ H”, blue histograms) and anti-mSR-B1  
652 (“ $\alpha$ M”, orange histograms), 24 hours after transfection. The grey histogram represents  
653 untransfected cells stained with the cognate antibody. **(E)** CD81KOH16 cells were transfected  
654 with hSR-B1, mSR-B1, ApicalH or ApicalM constructs, or no plasmid as a control (Mock), and

655 infected with PbGFP sporozoites 24 hours after transfection. The number of infected cells  
656 (EEFs) was determined by microscopy after UIS4 staining at 24 hours after sporozoite  
657 addition. The number of EEFs per well ranged from 43 to 334 (median 169) in hSR-B1-  
658 transfected wells. ns, non-significant; \*\*\*,  $p < 0.001$  (one-way ANOVA followed by Tukey's  
659 multiple comparisons test).

660

661 **Figure 5. A key domain within SR-B1 apex is essential for *P. berghei* infection.**

662 **(A)** Mouse and human protein sequence alignment of the apical region AA 132-223 with the  
663 corresponding predicted human secondary structure (alpha helices in red and beta strand in  
664 blue). Identical, similar and different amino acids are represented in black, blue and red  
665 respectively. Short domains D1, D2 and D3 are delimited by boxes. **(B)** Predicted tertiary  
666 structure of D1, D2 and D3 chimeras by homology modeling, highlighting the segments of  
667 mouse (orange) or human (blue) origins. **(C)** Top views of the electrostatic surface potential  
668 of D1, D2 and D3 chimeras' apex. Values are in units of  $kT/e$  at 298 K, on a scale of -2  $kT/e$   
669 (red) to +2  $kT/e$  (blue). White color indicates a neutral potential. Black circles highlight a  
670 differential electrostatic surface potential between the different chimeric constructs at the  
671 top of the "apex" region. **(D)** CD81KOH16 cells were transfected with hSR-B1, mSR-B1, D1,  
672 D2, or D3 chimeric constructs. Protein surface expression was analyzed using anti-hSR-B1  
673 (" $\alpha$ H", blue histograms) and anti-mSR-B1 (" $\alpha$ M", orange histograms), 24 hours after  
674 transfection. The grey histogram represents untransfected cells stained with the cognate  
675 antibody. **(E)** CD81KOH16 cells were transfected with hSR-B1, mSR-B1, D1, D2, or D3  
676 chimeric constructs, or no plasmid as a control (Mock), and then infected with PbGFP  
677 sporozoites 24 hours after transfection. The number of infected cells (EEFs) was determined



678 by microscopy after UIS4 staining at 24 hours after sporozoite addition. The number of EEFs  
679 per well ranged from 43 to 334 (median 169) in hSR-B1-transfected wells. ns, non-significant;  
680 \*\*,  $p < 0.01$  (one-way ANOVA followed by Tukey's multiple comparisons test).

681  
682 **Figure 6. The lipid transfer activity of SR-B1 is not required during *P. berghei* infection.**

683 **(A-D)** HepG2 or and Hepa1-6 cells were treated with BLT inhibitors (BLT1 and BLT4) at two  
684 different concentrations (2  $\mu\text{M}$  and 20  $\mu\text{M}$ ), either at the same time as sporozoite incubation  
685 (Coincubation: **A, C**) or prior to sporozoite addition (Preincubation: **B, D**). Control cells were  
686 treated with the solvent (DMSO) alone. The number of infected cells was analyzed after 24  
687 hours by microscopy after UIS4 staining. The number of EEFs per well ranged from 223 to  
688 545 (median 428) in control HepG2 cells, and from 43 to 378 (median 161) in control Hepa1-  
689 6 cells. All data come from two independent experiments and are represented as mean +/-  
690 range.

691  
692 **Supplemental figure 1**

693 CD81 KO Hepa1-6 cells were transfected with either mSR-B1, hSR-B1, ApicalH or ApicalM  
694 construct plasmids, or no plasmid as a control (Mock). Total protein expression was analyzed  
695 by western blot using polyclonal anti-SR-B1 antibodies (Ab24603) and anti-GAPDH  
696 antibodies as a loading control.

697  
698 **Supplemental figure 2**

699 **(A-B)** CD81KOH16 cells were transfected with hSR-B1, mSR-B1, ApicalH or ApicalM chimeric  
700 constructs, or with a plasmid encoding mCD81 (negative control). **(A)** Protein surface

701 expression was analyzed using anti-hSR-B1 (“ $\alpha$ H”, blue histograms) and anti-mSR-B1 (“ $\alpha$ M”,  
702 orange histograms), 24 hours after transfection. The grey histogram represents  
703 untransfected cells stained with the corresponding antibody. **(B)** Cy5 fluorescent HDLs were  
704 added to transfected cells 24 hours after transfection to measure HDL binding (purple peak).  
705 HDL binding to non-transfected cells (negative control) is shown as a white peak. Cells  
706 transfected with a mouse CD81 construct did not bind HDLs, as expected.

707

### 708 **Supplemental figure 3**

709 HepG2 cells were infected with PbGFP sporozoites in the presence of rhodamine-conjugated  
710 dextran and BLT inhibitors (BLT1 and BLT4) at two different concentrations (2  $\mu$ M and 20  
711  $\mu$ M), or DMSO as a control. Dextran-positive cells were analyzed by flow cytometry 3 hours  
712 after sporozoite addition.

713

### 714 **Supplemental table 1**

715 Sequences of oligonucleotides and synthetic genes used in this study.

716

717 **Supplemental table 1**

|                          | Oligonucleotide | Sequence 5' → 3'                                      |
|--------------------------|-----------------|-------------------------------------------------------|
| <b>ApicalH construct</b> | ApicalHfor      | ACCGATCCAGCCTCCGCGGGCCCTGC                            |
|                          | ApicalHrev      | GAGGCGCACCAACCTGCAGGTGCTG                             |
| <b>ApicalM construct</b> | ApicalMfor      | CGTGTCCCTTCCTCGAGTACCGCACCTTCCAGTTCC                  |
|                          | ApicalMrev      | GAGGTGGATCCTCGAGATGTTCTGGACCCCGTG                     |
| <b>D1 construct</b>      | mSRBIfor        | ACCGATCCAGCCTCCGCGGGCCCTGC                            |
|                          | D1rev           | CATGATGAGCTTCAGGGTCATGGGCTTATTCTCCATCAATATCGAGCCCCCAG |
|                          | D1for           | CTGAAGCTCATCATGACCTTGGCATTACCACGATGGGCCAGCGTGC'TTTATG |
|                          | mSRBIrev        | GAGGCGCACCAACCTGCAGGTGCTG                             |
| <b>D2 construct</b>      | mSRBIfor        | ACCGATCCAGCCTCCGCGGGCCCTGC                            |
|                          | D2rev           | GGGGAACATGCCTGGAAAGTACTTGTGAGAAAATGCACGAAGGGATCGTC    |
|                          | D2for           | CCAGGCATGTTCCCTTCAAGGACAAATTTGGCCTGTTTGTGGGATGAAC     |
|                          | mSRBIrev        | GAGGCGCACCAACCTGCAGGTGCTG                             |
| <b>D3 construct</b>      | mSRBIfor        | ACCGATCCAGCCTCCGCGGGCCCTGC                            |
|                          | D3rev           | AAATAATCCGAACCTGTCTTGAAGGGAAGCATGTCGGGAGGTACGTG       |
|                          | D3for           | AAGTTCGGATATTGCTGAGCTCAACAACCTCGAATTCGGGGTCTTCACTGTG  |
|                          | mSRBIrev        | GAGGCGCACCAACCTGCAGGTGCTG                             |

**ApicalH synthetic gene**

accgatccagcctccgcgggccctgccaccatgggcggcagctccagggcgcg  
tgggtggccttgggggtggggcgccctggggctgctggttgcctgcgctcggcggt  
gtcatgatcctcatggtgccctccctcatcaagcagcaggtgctcaagaatgct  
cgcatagaccgagcagcctgtccttcgggatgtggaaggagatccccgctcct  
ttctaactgtctgtctacttcttcgaagtggtaacccaaacgaggtcctcaac  
ggccagaagccagtagtccgggagcgtggaccctatgtctacagggagttcaga  
caaaaggtcaacatcaccttcaatgacaacgacaccgtgctccttcgtggagaac  
cgcagcctccatttccagcctgacaagtcgcatggctcagagagtgactacatt  
gtactgCCCAACATCCTGGTCTTGGGTGCGGGGTGATGATGGAGAATAAGCC  
ATGACCTGAAGCTCATCATGACCTTGGCATTACCACCTCGGCCGAACGTGCC  
TTTCATGAACCGCACTGTGGGTGAGATCATGTGGGGCTACAAGGACCCCTTGTG  
AATCTCATCAACAAGTACTTTCAGGCATGTTCCCTTCAAGGACAAGTTCGGA  
TTATTTGCTGAGCTCAACAACCTCGaattctggggcttctcactgtcttcacgggc  
gtccagaatttcagcaggatccatctggtggacaaatggaacggactcagcaag  
atcgattattggcattcagagcagtgtaacatgatcaatgggacttccgggcag  
atgtggcacccttcatgacaccgaaatcctcgctggaattcttcagcccggag  
gcatgcaggtccatgaagctgacctacaacgaatcaaggggtggttgaggcatt  
cccacgtatcgcttcacggccccgatactctggttgccaacgggtccgtctac  
ccaccaacgaaggcttctgcccattgcccagagagctggtcattcagaatgtcagc  
acctgcaggtttggtgcgcctc

**ApicalM synthetic gene**

cgtgtccttccctcgagtaccgcaccttccagttccagccctccaagttcccagg  
ctcggagagcgactacatcgatcagCCCAACATCCTGGTCTTGGGGGCTCGAT  
ATTGATGGAGAGCAAGCCTGTGAGCCTGAAGCTGATGATGACCTTGGCGCTGGT  
CACCATGGGCCAGCGTGTCTTTATGAACCGCACAGTTGGTGAGATCCTGTGGG  
CTATGACGATCCCTTTCGTGATTTTCTCAACACGTACCCTCCAGACATGCTTCC  
CATAAAGGGCAAATTTGGCCTGTTTGTGAGCTCAACAACCTCCgactctgggct  
cttcacgggtgttcacgggggtccagaacatctcgaggatccacctc

# Langlois et al Figure 1

bioRxiv preprint doi: <https://doi.org/10.1101/2020.03.16.994731>; this version posted March 18, 2020. The copyright holder for this preprint (which was not certified by peer review) is the author/funder. All rights reserved. No reuse allowed without permission.

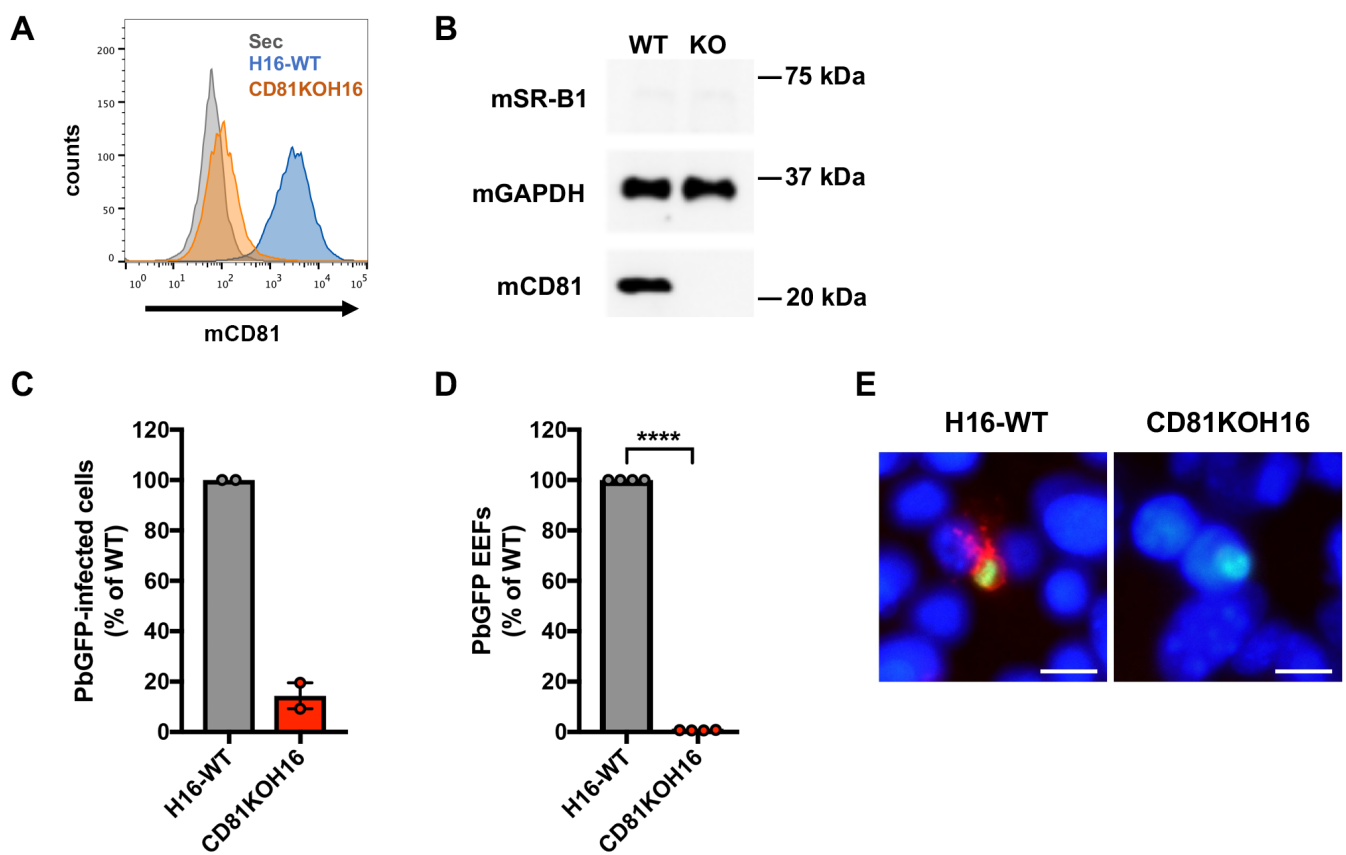

# Langlois et al Figure 2

bioRxiv preprint doi: <https://doi.org/10.1101/2020.03.16.994731>; this version posted March 18, 2020. The copyright holder for this preprint (which was not certified by peer review) is the author/funder. All rights reserved. No reuse allowed without permission.

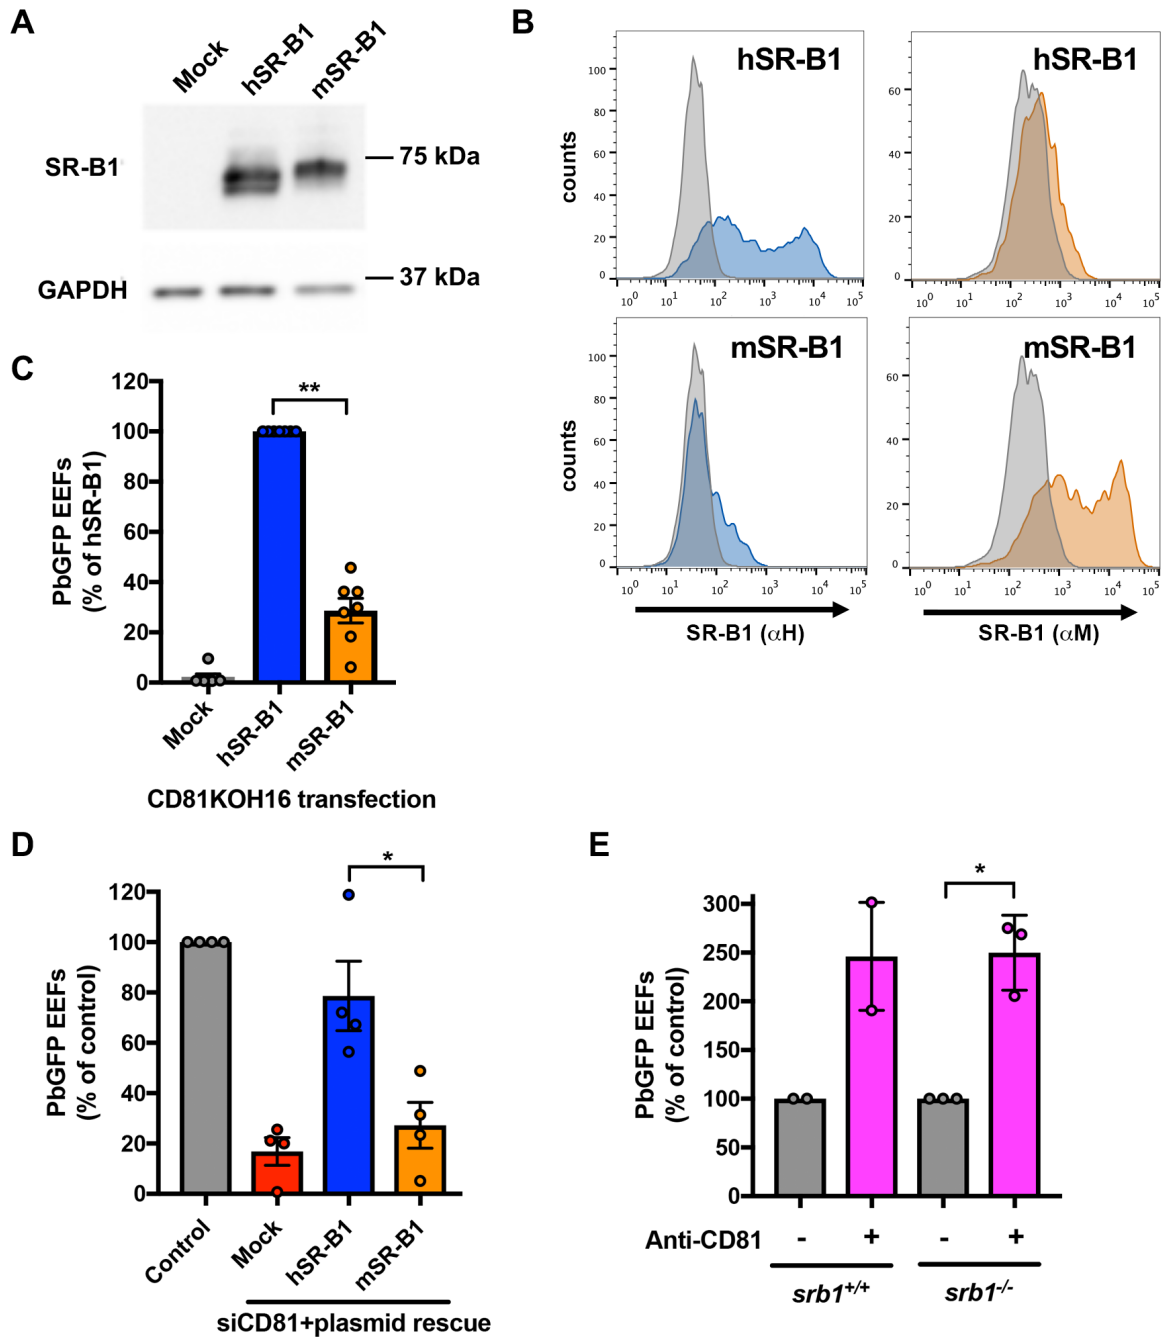

# Langlois et al Figure 3

bioRxiv preprint doi: <https://doi.org/10.1101/2020.03.16.994731>; this version posted March 18, 2020. The copyright holder for this preprint (which was not certified by peer review) is the author/funder. All rights reserved. No reuse allowed without permission.

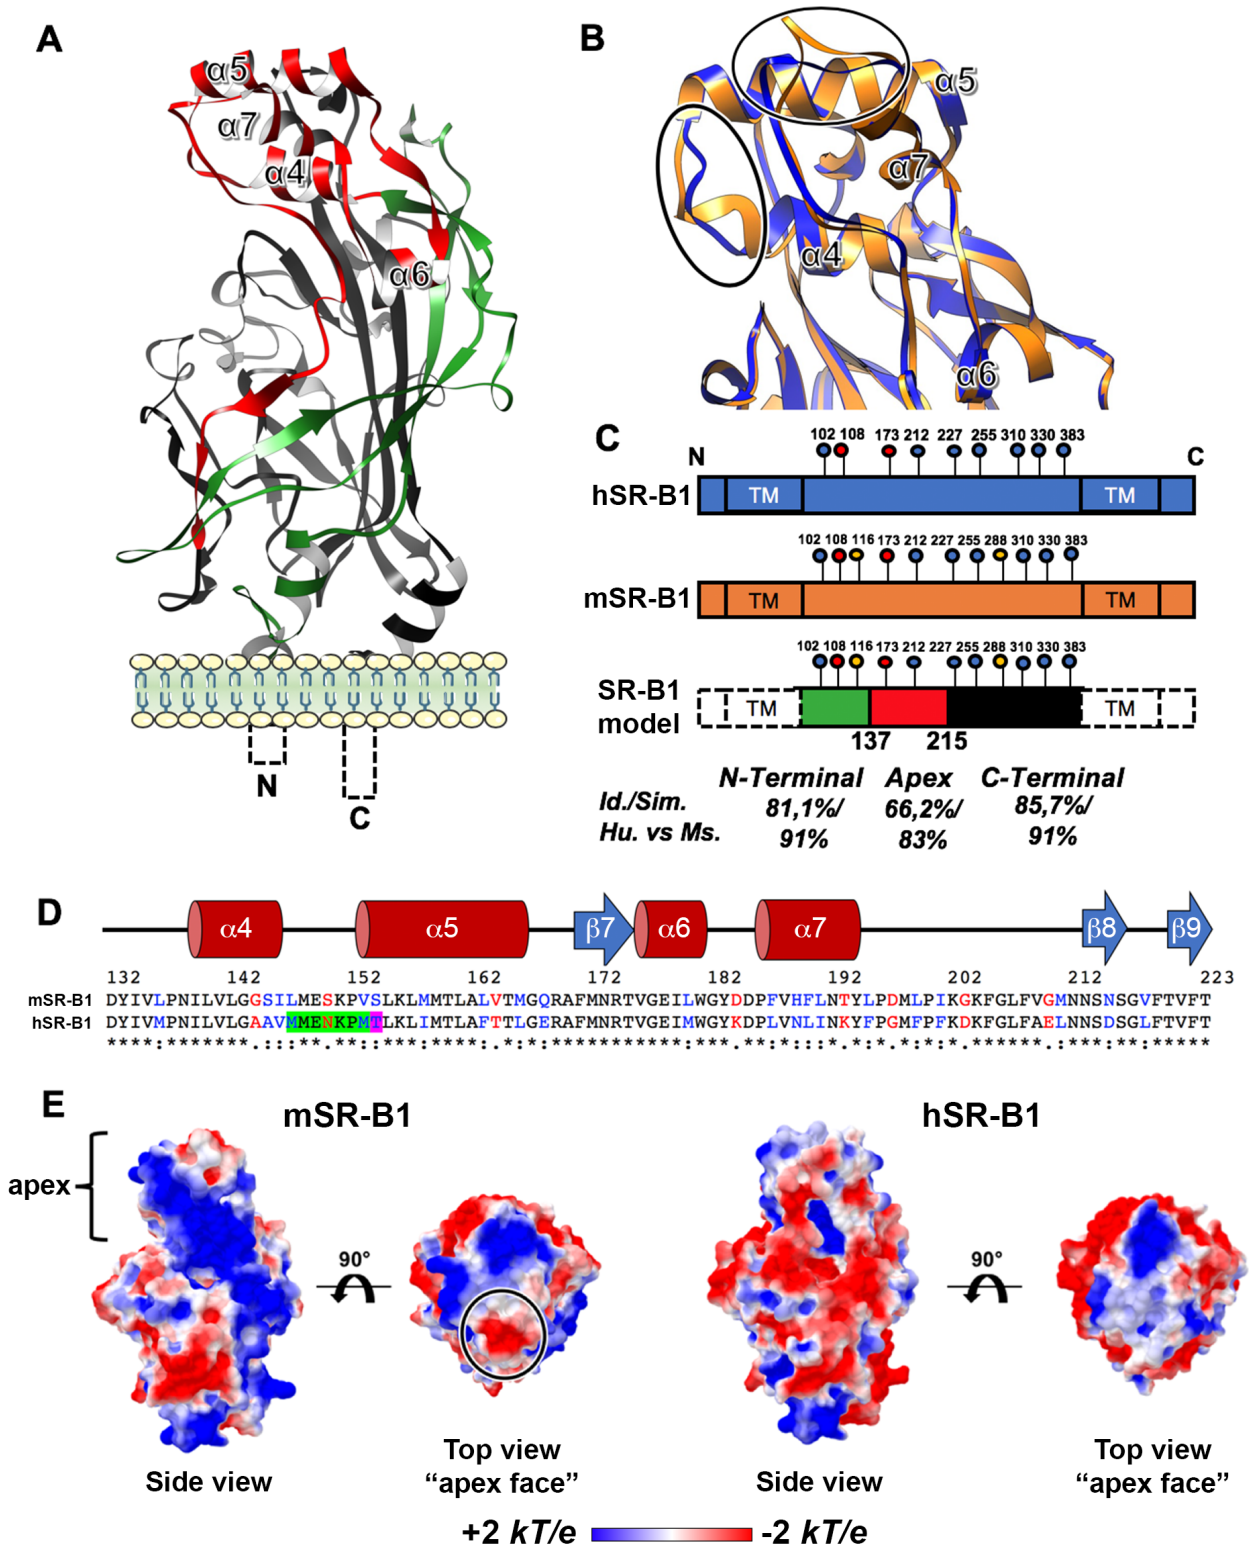

# Langlois et al Figure 4

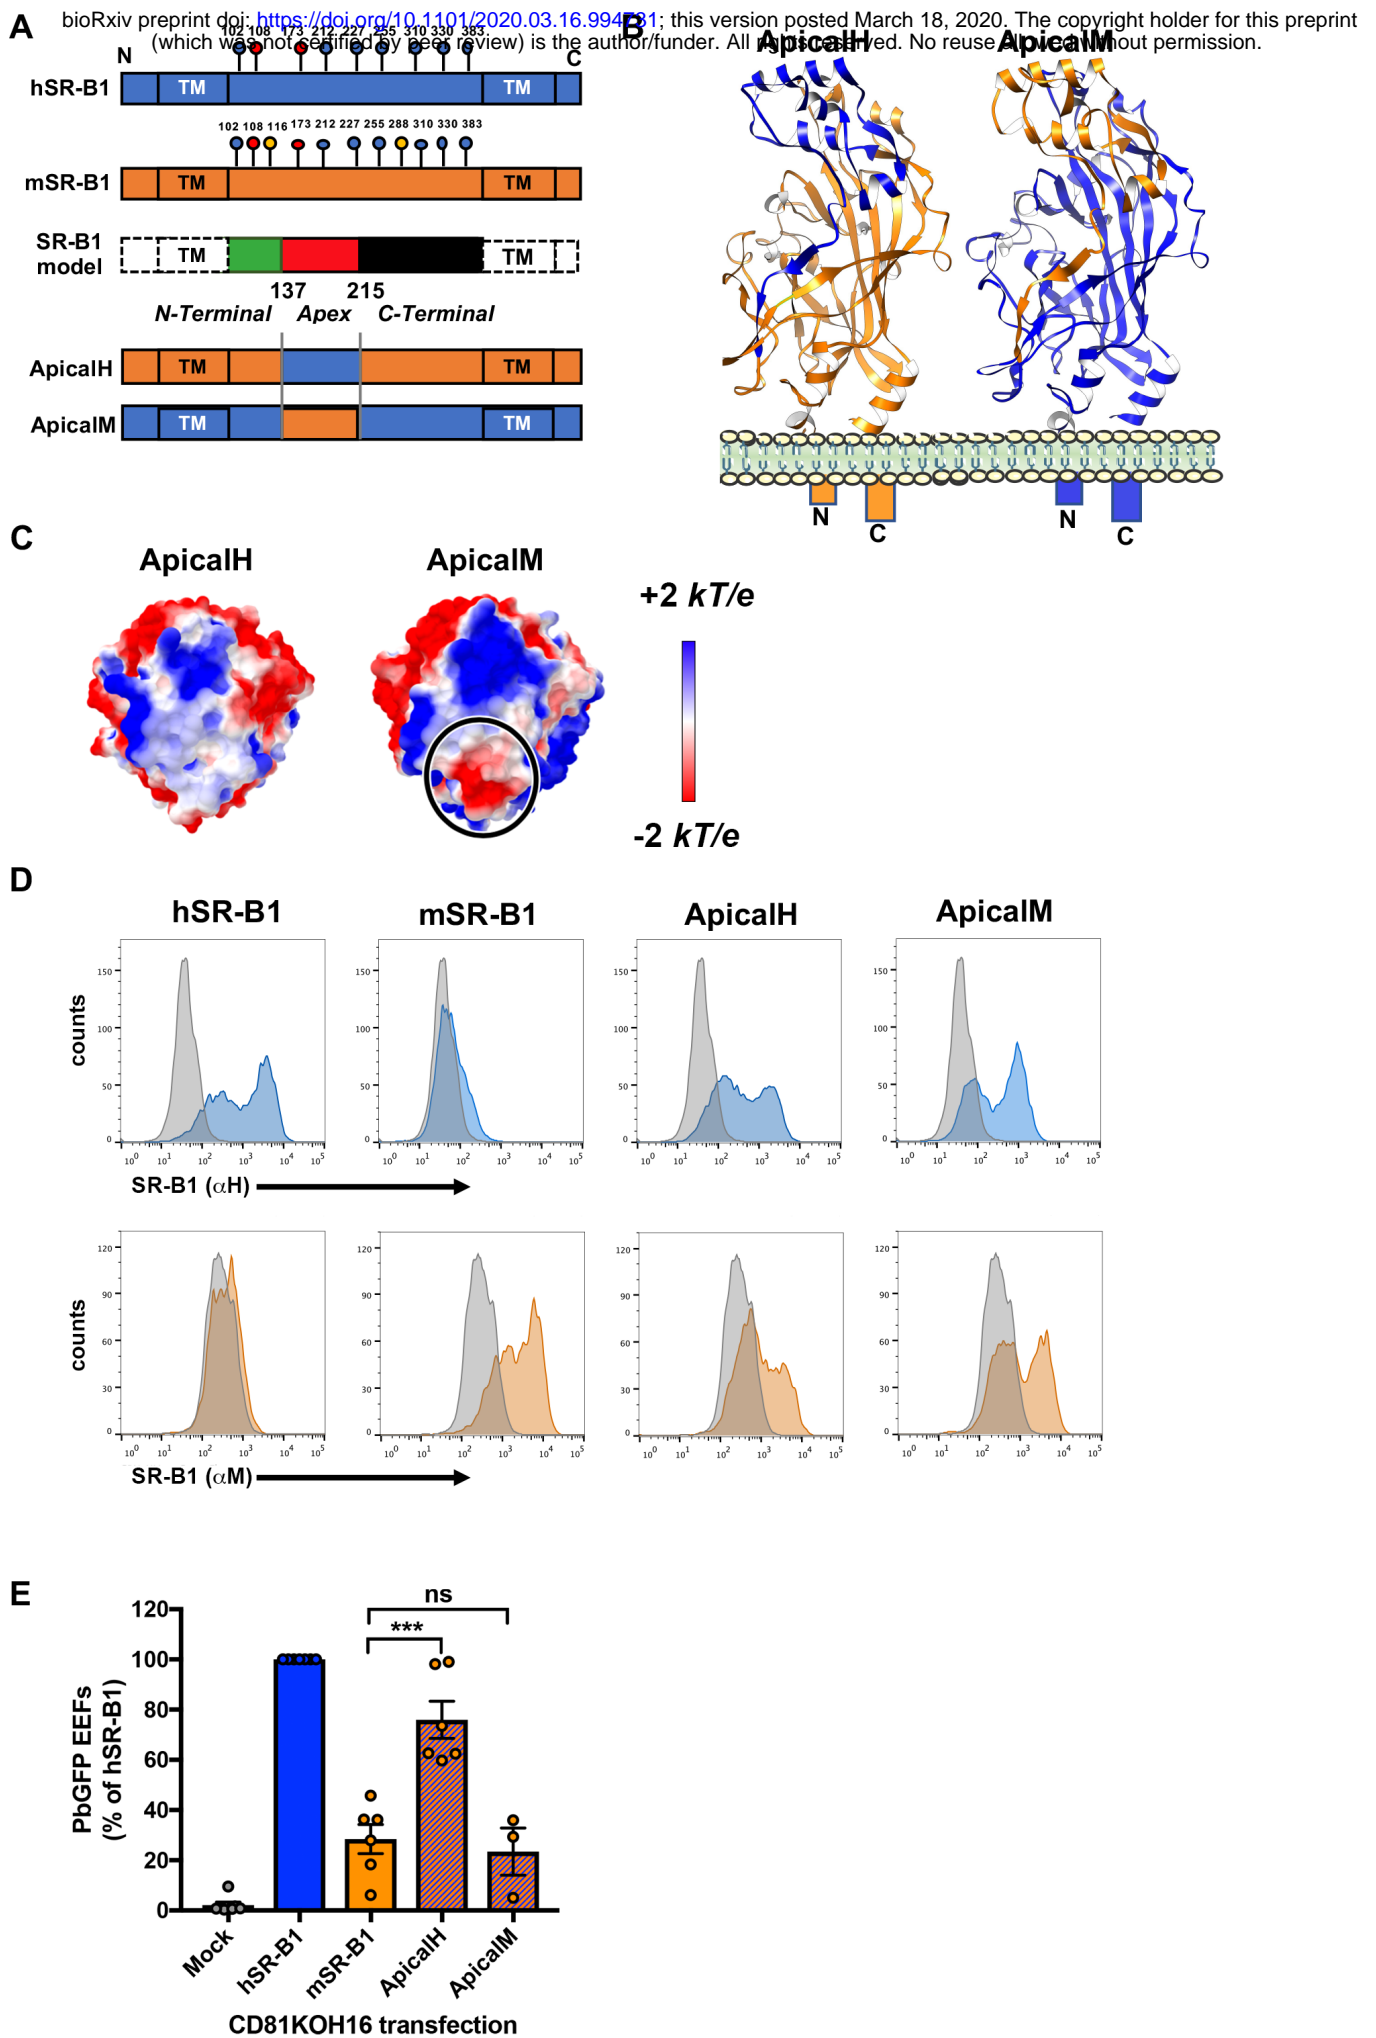



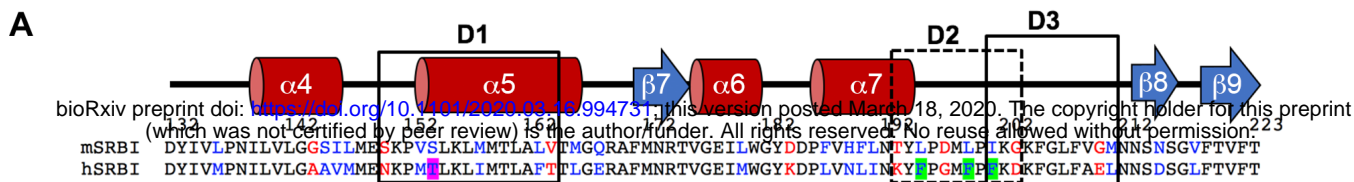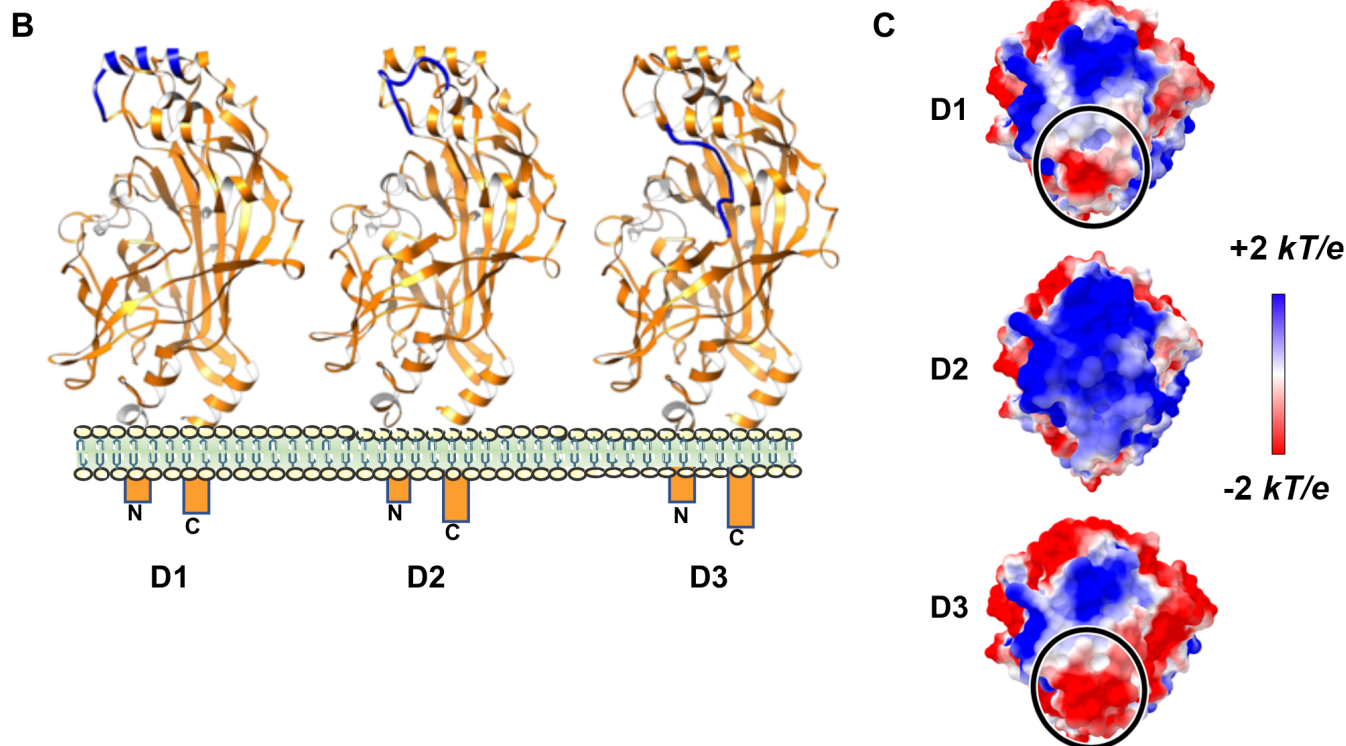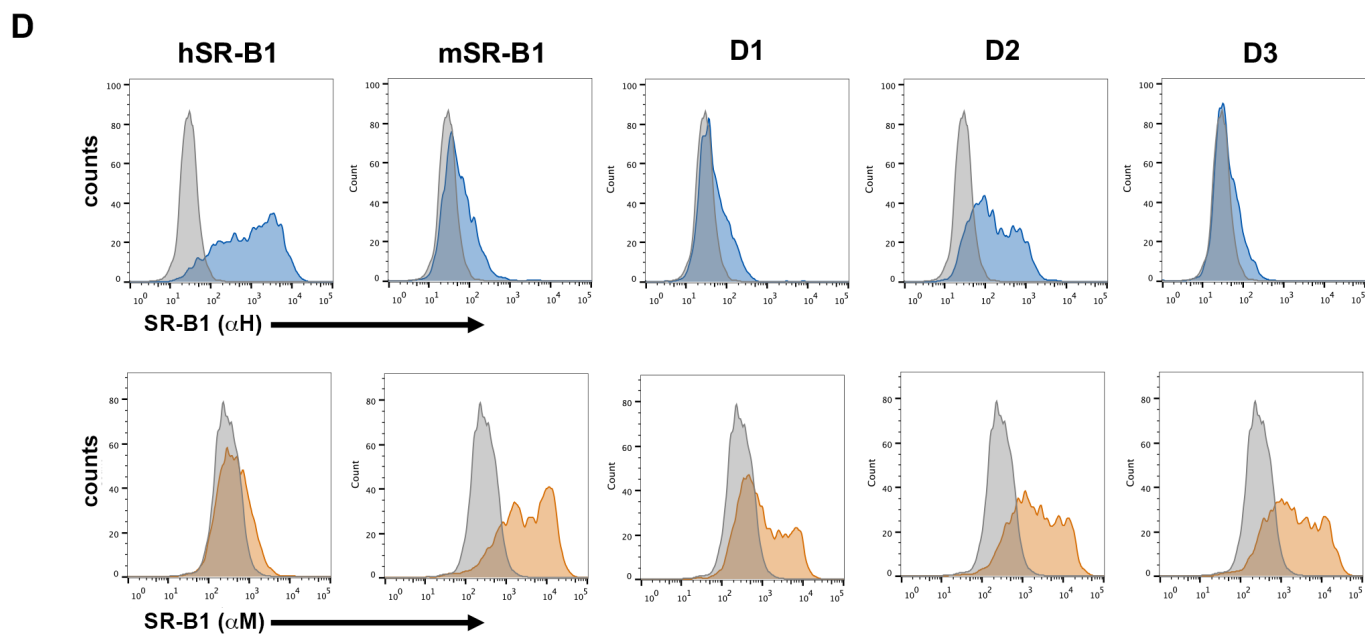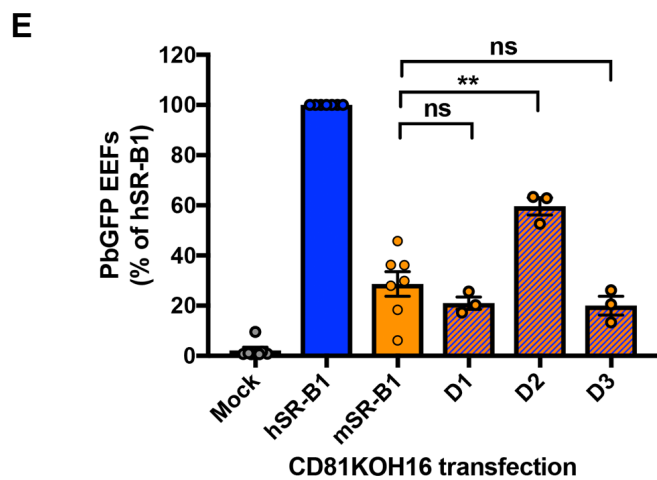



## Langlois et al Figure 6

bioRxiv preprint doi: <https://doi.org/10.1101/2020.03.16.994731>; this version posted March 18, 2020. The copyright holder for this preprint (which was not certified by peer review) is the author/funder. All rights reserved. No reuse allowed without permission.

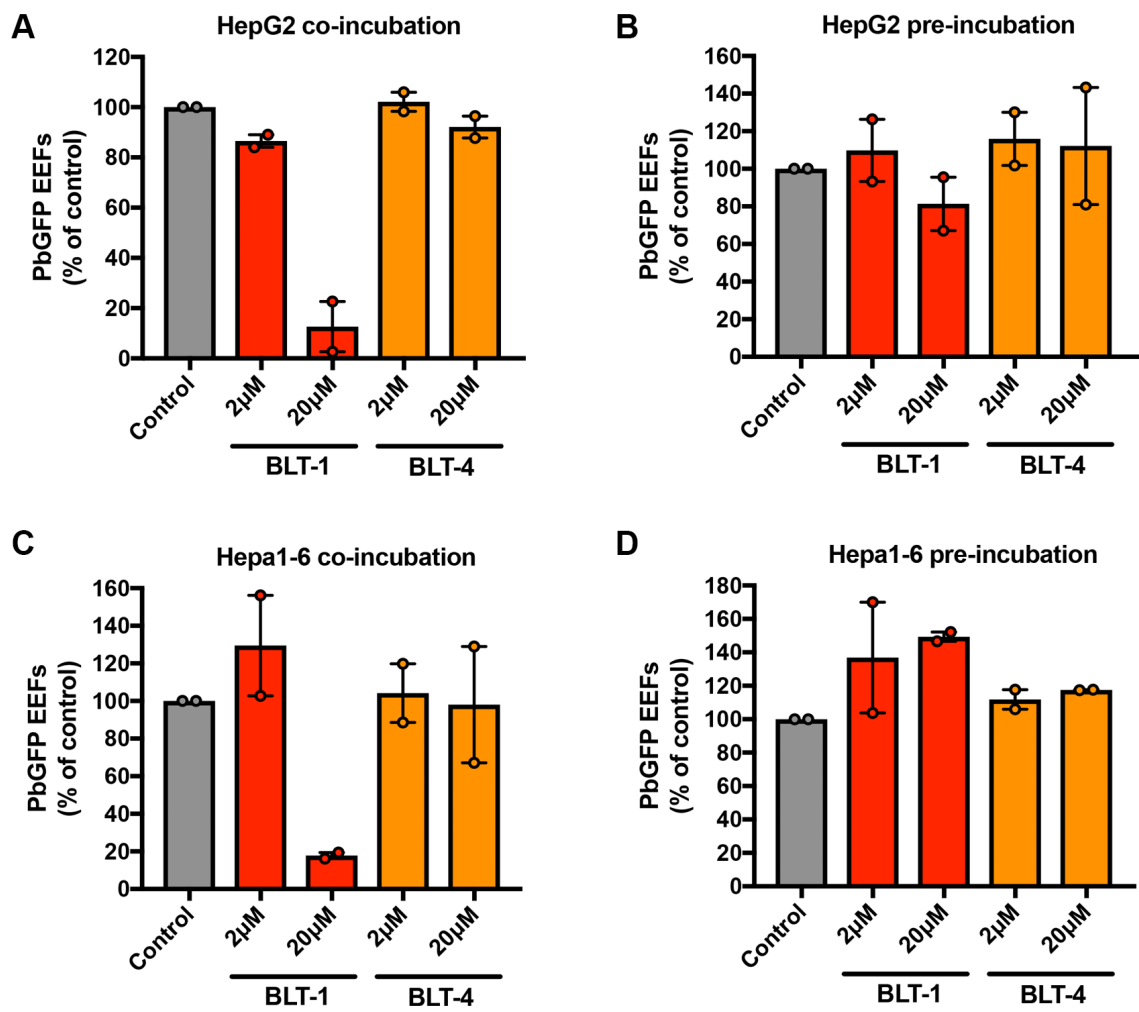

## Langlois et al Supplemental Figure 1

bioRxiv preprint doi: <https://doi.org/10.1101/2020.03.16.994731>; this version posted March 18, 2020. The copyright holder for this preprint (which was not certified by peer review) is the author/funder. All rights reserved. No reuse allowed without permission.

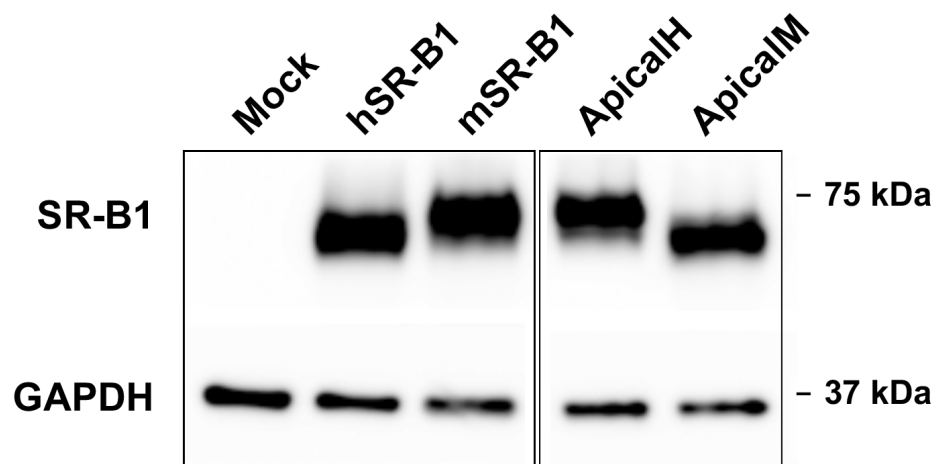

## Langlois et al Supplemental Figure 2

bioRxiv preprint doi: <https://doi.org/10.1101/2020.03.16.994731>; this version posted March 18, 2020. The copyright holder for this preprint (which was not certified by peer review) is the author/funder. All rights reserved. No reuse allowed without permission.

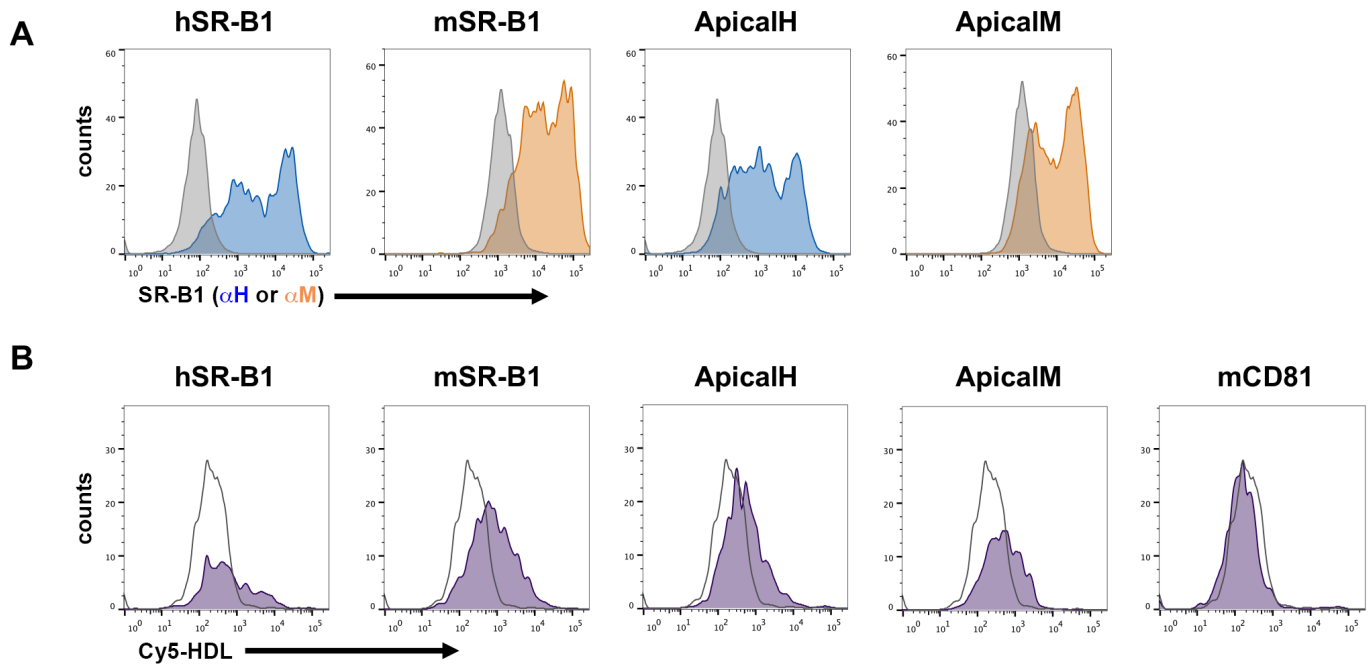

### Langlois et al Supplemental Figure 3

bioRxiv preprint doi: <https://doi.org/10.1101/2020.03.16.994731>; this version posted March 18, 2020. The copyright holder for this preprint (which was not certified by peer review) is the author/funder. All rights reserved. No reuse allowed without permission.

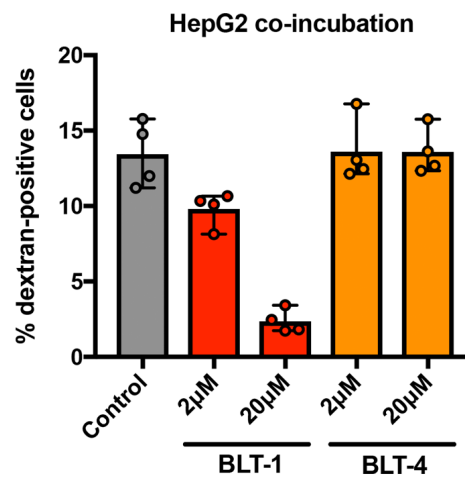

Source: https://www.biorxiv.org/content/10.1101/2020.03.16.994731v1.full.pdf
